# Supplementary material for: Influence of the North Atlantic Oscillation on European tropospheric composition:an observational and modelling study
Source: Copernicus journal article supplement (doi:10.5194/acp-2017-979), 2017-12-18
Supplement: Supplementary file [file acp-2017-979-AC1-supplement.pdf]

## **Response to Reviewer Comments on Manuscript “Influence of the North Atlantic Oscillation on European tropospheric composition: an observational and modelling study”**

We thank the reviewers for their comments and suggestions for the manuscript. The reviewer comments are given below in black text, followed by our responses in red text and any additions to the manuscript in blue text. References to page and line numbers are based on the ACPD version of the manuscript.

**Firstly, as all three reviewers had similar “general comments”, we have prepared responses to these points applicable to all the reviewers. These are:**

### 1.1. Why is the work novel?

Several studies have indeed looked at the interaction of the NAO and composition using datasets (e.g. satellite or surface) and models. However, many of these studies were performed 10-15 years ago and new satellite missions (see point 1.2) allow us to build upon previous work (e.g. Eckhardt et al., 2003; Creilson et al., 2003) to see if these relationships seen in the past are still valid and if newer more sophisticated instruments see similar or different patterns. Secondly, some studies (e.g. Pausata et al., 2012) have used satellite data only to evaluate models and not to examine if the model composition – NAO interactions can be seen in the satellite data itself. Finally, many studies (e.g. Pausata et al., 2012; and Thomas and Devasthale 2014) have looked at 1 or 2 pollutants in isolation. Our study analyses several species. Therefore, we feel that this is a timely study building upon previous work which uses a novel synergy of model and satellite datasets to investigate the influence of the NAO on multiple tropospheric (UTLS) pollutants (e.g. the anti-correlation in the NO<sub>x</sub> and ozone responses to the NAO).

We have updated the Introduction to explain this on P4 L10-20 “In this study, we aim to better constrain previously investigated relationships (e.g. NAO - TCNO<sub>2</sub>, Eckhardt et al., 2003) and quantity unexplored relationships (e.g. vertical ozone profiles and upper troposphere – lower stratosphere (UTLS) peroxyacetyl nitrate (PAN)) between the NAO and atmospheric composition by utilising recent satellite observations with higher spatial resolution, more frequent sampling and smaller uncertainties (e.g. Ozone Monitoring Instrument (OMI) TCNO<sub>2</sub>) and simulations from the TOMCAT chemistry transport model (CTM). These tools allow for a more comprehensive assessment of recent interactions between the NAO and tropospheric composition, the correlation response between trace gases, the extent to which the NAO can influence UTLS composition and an understanding of the key processes governing pollution levels over source regions. Section 2 discusses the observations and model setup, Section 3 describes the links between satellite observed/model composition and the NAO and our discussion and conclusions are presented in Sections 4 and 5.”.

### 1.2. What is the justification for using these satellite datasets?

Eckhardt et al., (2003) investigated the impact of the NAO on satellite observed (GOME) TCNO<sub>2</sub> finding a reduction in TCNO<sub>2</sub> over the UK/north-western Europe. The enhancement of the westerly flow in NAO+ yielded a reduction in TCNO<sub>2</sub> linked to its long-range transport. Though a useful result from Eckhardt et al., (2003), the signal of the order of 10<sup>14</sup> molecules/cm<sup>2</sup> is rather weak compared to the average concentrations. The differences are also the NAO+ composite minus the NAO- composite, while here we use the seasonal average to find the impact of the NAO on TCNO<sub>2</sub>. Finally, given the large uncertainties in the DOAS technique, I would expect signals of this magnitude to likely be well within the uncertainty range of the composition averages in each grid cell over the UK/north-western Europe.

Therefore, our use of the OMI TCNO<sub>2</sub>, which is a spatially higher resolution instrument with a larger sample size, finds similar signals over the UK/north-western Europe but outside the uncertainty of the instrument with anomalies in the order of 10<sup>15</sup> molecules/cm<sup>2</sup> highlighting a more robust signal.

In term of the manuscript text, we have added the following text on P6 L11 “We primarily use OMI TCNO<sub>2</sub> data as the instrument has a much higher spatial resolution and sampling than the GOME TCNO<sub>2</sub> data used by Eckhardt et al., (2003). Therefore, we use OMI to build upon that work and explore whether we can detect a more robust TCNO<sub>2</sub>-NAO signal, which is challenging given the short lifetime of NO<sub>2</sub>.”.

For tropospheric ozone, only a few studies have looked at the interaction between ozone and the NAO. Creilson et al., (2003) used the TOR product to look at this interaction over the southern Europe during the spring time NAO. Therefore, they were limited to the investigation of just the tropospheric column and looked at a different season to our study. Secondly, Pausata et al., (2012) only used the TOR data to evaluate their model, before having a detailed look at the modelled linked between the NAO and ozone. Therefore, there is a clear gap to use satellite tropospheric ozone data (i.e. from TES) which can be used to investigate the responses of ozone to the NAO, and can also provide important vertical information. As we show in our results from Section 3.1.3, there are clear differences between the two phases in ozone response to the NAO in Zones 1 & 2 on opposite sides of the North Atlantic. These patterns have not be found previously using satellite data.

We have made this point clearer in the Section 1 on P6 L17 “Previous studies of the NAO impacts on ozone have only used satellite tropospheric column data either directly or to evaluate model simulations. Therefore, the vertical ozone profiles retrieved by TES provide the opportunity to better understand the vertical response of ozone from NAO circulation patterns.”.

For MIPAS PAN, as far as we are aware, this data has never been used before to look at potential impacts of the NAO on UTLS composition. As stated in the Introduction, Thomas and Devasthale (2014) used AIRS CO at 500 mb to look at the impact of the NAO on CO over Scandinavia, but limited research has been done using satellite data to see the response of pollutants to the NAO in the UTLS. PAN has a lifetime of several months once in the upper troposphere, so is a potentially good tracer for looking at polluted air masses. By using the MIPAS PAN data and the TOMCAT output in combination, we are able to explain these interactions (see sections 3.1.2 & 3.2.2). This is especially true for NAO-, where Figure 3d, 10d and 11d show that the satellite can detect enhanced PAN over Iceland in NAO- in the UTLS, which is simulated by the model and then shown to be due to the vertical transport of polluted tropospheric air masses from southern/central Europe into the UTLS over Iceland. Therefore, the use of MIPAS data is novel and, with the help of a model, highlights pathways of pollution transport into the UTLS.

We have made this point more clear on P7 L5 “Few studies have directly used satellite measurements of composition to investigate the influence of the NAO on UTLS trace gas distributions. This is the first study to use satellite retrieved UTLS PAN, which has a lifetime of several months in the UTLS (Singh et al., 1996), to investigate the impact of NAO tropospheric circulation patterns on UTLS composition.”.

### 1.3. What is the added benefit of the TOMCAT model simulation?

The three satellite instruments, while providing useful information, do not have the same temporal and spatial coverage of a CTM. OMI TCNO<sub>2</sub> is an integrated column value and provides no vertical/surface information. The TES ozone data provides useful vertical information down into the boundary layer but has poor spatial coverage. Therefore, it is difficult to get a clear spatial pattern from the data alone. Hence, we collate the data into 4 regions and investigate changes in the vertical

profiles in response to the NAO. However, TOMCAT is able to provide detailed surface fields and vertical profiles across the entire domain. Finally, the MIPAS PAN in the UTLS provides limited information on exchanges of pollutants from the lower troposphere into the upper troposphere. For instance, even though MIPAS PAN shows enhanced PAN over the Icelandic region in the UTLS during NAO-, it is the model simulations (see Figure 11d) which identifies the source of this UTLS PAN enhancement from vertical ascent of polluted tropospheric air.

To make this more clear in the manuscript we have added, on P8 L16, “Here, the TOMCAT simulations help to diagnose the key processes governing the satellite derived NAO-composition relationships by providing information (e.g. the surface) where the satellite instruments cannot detect trace gases and offers full spatial/temporal data coverage.”.

1.4. The conclusions are too generic and need expanding.

We agree that the conclusions need to be more focussed. We have rewritten them as:

“This study has used state-of-the-art satellite data records of atmospheric trace gases to identify recent influences of the North Atlantic Oscillation (NAO) on tropospheric composition over the North Atlantic and Europe. We have used tropospheric column  $\text{NO}_2$  ( $\text{TCNO}_2$ ) measurements from the Ozone Monitoring Instrument (OMI), which provides higher resolution and sampling than past instruments, to detect clear and significant responses (i.e. reduction in UK  $\text{TCNO}_2$  during NAO-high) from NAO circulation patterns, building upon the initial signal reported by Eckhardt et al. (2003). Vertical profiles of ozone from the Tropospheric Emissions Spectrometer (TES) allow a detailed assessment of satellite-observed lower tropospheric ozone sampled under the NAO phases. Robust, statistically significant signals are found on both sides of the North Atlantic as a result of changes in the westerly circulation during the two NAO phases. Finally, peroxyacetyl nitrate (PAN) observations in the upper troposphere-lower stratosphere (UTLS) from the Michelson Interferometer for Passive Atmospheric Sounding (MIPAS) are exploited, given the long lifetime of PAN (several months, Singh et al., 1996), for the first time to investigate vertical transport of polluted tropospheric air masses into the UTLS under different NAO conditions.

Our results, supported by simulations from the TOMCAT chemistry transport model (CTM), confirm that primary pollutant (i.e.  $\text{NO}_2$ ) concentrations are reduced (enhanced) under NAO-high (NAO-low) conditions over Europe, heavily dependent on the strength of the westerly flow across the Atlantic. However, secondary pollutants, such as ozone, have anti-correlated patterns as maritime air masses (ozone-enriched air formed downwind from North American primary pollutant emissions) disperse polluted European air masses under NAO-high conditions, significantly increasing the background ozone levels. Under NAO-low conditions, the slackening of the North Atlantic westerly flow, allows for the accumulation of primary pollutants over Europe, where ozone concentrations are further decreased by ozone titration (loss through reaction with nitric oxide,  $\text{NO}$ ). Different responses to that over Europe are observed and simulated by TES and TOMCAT over the western North Atlantic where enhanced westerly flow (NAO-high conditions) yields lower ozone concentrations over eastern North America through pollutant (both ozone and ozone precursors) long range transport towards Europe. However, the weakening of the westerly flow (NAO-low conditions) allows ozone to accumulate/form over the region. We also find that NAO circulation is important for UTLS composition as polluted air masses (e.g. with high PAN content) originating from Europe during NAO-low (accumulation of lower tropospheric pollution) can propagate to this altitude resulting in elevated PAN concentrations over Iceland/Southern Greenland. Model simulations show UTLS ozone spatial patterns over the North Atlantic are strongly anti-correlated to that of PAN, where the two trace gases act as flags for polluted tropospheric and clean stratospheric air in the UTLS.

Overall, the use of recent satellite data sets, not used in context of the NAO before, and a model simulation have quantified the recent influences of the NAO on tropospheric composition and co-variability between pollutants.”.

#### **Direct Responses to Review 1's Comments:**

In this paper, the authors combine multiple satellite observations with CTM simulations to characterise the overall distribution of 3 chemical species, NO<sub>2</sub>, PAN and O<sub>3</sub>. Whilst the presentation of satellite observations and CTM simulations is clear, the overall aim of the study is too generic – “to investigate the impact of the NAO circulation on tropospheric composition”. As a result, the main conclusion of the paper is also very general and does not, in its current form, constitute a new finding. I recommend that this paper undergoes significant major revisions.

#### General comments

1. Abstract and introduction: The structure of the introduction does not move on from what is known already, towards the issue that remains unknown and will be studied. As a result, it is not possible to determine the innovative aspect of this research. The authors need to state clearly which gap in the scientific knowledge this paper aims to fill and set out some specific research questions or hypothesis.

Please see response in general points 1.1 and 1.4.

2. Results: The authors have chosen to present the results in 2 sections. First the observations of tropospheric composition (section 3.1) and second the model simulations of tropospheric composition (section 3.2). Currently, use of the CTM simulations to ‘diagnose the relationships seen in the satellite data’ relies on the CTM composite wind fields. A similar result could be achieved using re-analysis wind fields. What is the additional benefit of using a complex CTM?

Please see response in general point 1.3.

3. The main conclusion is that the NAO is an ‘important driver of winter-time atmospheric composition across Europe’. As the authors themselves state in the introduction, several previous studies have reached the same conclusion and therefore this is not a novel result. Please can the authors focus their research question and use the high quality datasets available to them to answer it.

Please see response in general point 1.1 and 1.4.

#### Specific comments

1. Page 2 line 16: ‘altitude’ is usually used as a vertical distance measurement but here it could be interpreted as a latitudinal distance. Can this be re-worded to make its use clearer?

Yes the term “altitude” in this case does refer to “a vertical distance measurement” and not “a latitudinal distance”. However, I’m not sure why the reader would assume altitude would mean “a latitudinal distance”. This text to us appears to be clear and we plan to leave it as it is.

2. Page 2 line 18: The authors refer to transport from the troposphere into the UTLS. As part of the troposphere is in the UTLS by definition, should troposphere be midtroposphere here?

We have replaced “troposphere” with “mid-troposphere”.

3. Page 3 line 10: Here and elsewhere the authors refer to enhanced westerly circulation as ‘storm tracks’. Of course, the low-level eddy driven westerlies can be used as a proxy for the storm track but it should be stated that this is the assumption here.

We believe the term “storm track” is suitable as we are being consistent with the literature (i.e. Hurrell et al., 1995 and Osborn, 2006) which uses this terminology frequently.

4. Page 3 line 12: ‘re-orientation’ should be reorientation I think.

We have changed this.

5. Page 4 line 10: The authors here claim that they are building on previous work but it is not clear from the introduction specifically what research question(s) they are addressing (see also general comment 1).

Please see response in general points 1.1 and 1.4.

6. Page 4 line 14: What is the advantage of higher resolution and more frequent observations? How does this allow the authors to discover that was not known before?

As stated in general point 1.2, the signal seen in tropospheric column NO<sub>2</sub> by Eckhardt et al., (2003) is small relative to the absolute column averages and uncertainties on older instruments such as GOME, which will be larger given the coarseness of the instrument and infrequency of the observations (i.e. larger random errors). Here, in Figure 2 we reproduce a similar signal to Eckhardt et al., (2003) over parts of north-western Europe (mainly the UK) in NAO-, but with a more robust result as the deviation from the average under NAO+ conditions is of the same order of magnitude to that of the absolute concentrations (i.e.  $\times 10^{15}$  molecules/cm<sup>2</sup>) and outside the satellite uncertainties. Plus the WRT has also been used to show the results are statistically significant in several regions of the domain at the 95% confidence level. We have addressed this point in the manuscript with the text added from general point 1.2.

7. Page 4 line 24: What time period is used to normalise the pressure data? Also, why does the study focus on wintertime only? In some situations November data is included, but not in all, why isn't the same period used for all of the data?

The pressure fields between 2006 and 2015 have been normalised by the 2006-2015 winter-time (DJF) standard deviation. This is suggested on P5 L2 where the blue dotted lines are stated to represent the 1.0 and -1.0 standard deviations. However, to make this clearer, we have added on P4 L26:

“(normalised by the time-series stand deviation)” after “time-series” and removed “normalised” on P4 L25.

We focus on the winter-time NAO because this is the season when the influence of the NAO is strongest on North Atlantic circulation, as suggested by Hurrell et al., (1995) and Osborn (2006). This is also stated in the Introduction on P3 L3-5. However, we agree the focus of this winter season could be made more clearly, despite the points above, so the title of the manuscript has been changed to “Influence of the winter-time North Atlantic Oscillation on European tropospheric composition”.

We have now redone the analysis of all observations and model species for the winter-time NAO defined as November-December-January-February (NDJF). The text throughout the manuscript has been modified to reflect the slight changes in the spatial patterns of the relationships caused by the inclusion of November data.

8. Page 5 line 28: The 10km wind composites during different phases of the NAO are included in figure 1 but only briefly referred to in the text. Why were these figures included and how do they relate to the subsequent analysis?

The main purpose of Figure 1 was to highlight the impact of the wintertime NAO on circulation patterns over the North Atlantic region. The plots at 10 km were included to help analyse the MIPAS PAN responses to the NAO phases. The links between pressure anomalies / circulation patterns in the UTLS (Figure 1) are briefly discussed in section 3.1.2 with the satellite data, but the reader is then referred from P 9 L 24 to section 3.2.2 on P14 L22. Here the text states, P14 L20-24 “PAN accumulation over Iceland and Southern Greenland (25 ppbv) correlates with the large UTLS pressure increase shown in Figure 1d. Figure 10d highlights the significant enhancement of PAN over Iceland/Southern Greenland with positive anomalies, relative to the winter-time average, of 5-10 pptv.” Therefore, we are linking the enhancement of UTLS pressure over Iceland in NAO- to the observed and modelled enhancement in UTLS PAN. Discussion of Figure 11d highlights the accumulation of PAN over the Iceland latitude band in the zonal UTLS NAO- PAN anomalies where vertical transport of PAN is from the polluted lower troposphere over Europe.

9. Page 6 section 2.2: This section details the satellite observations used in the study. However, as the authors have not motivated their decision to focus on PAN, NO<sub>2</sub> and O<sub>3</sub> in the introduction, it reads like a list of available data sources, rather than the necessary data needed to answer the research question posed. Why are these observations rather than others used in the paper?

Please see response in general point 1.2.

10. Page 7 section 2.3: This section appears to contain a lot of information that is not necessary to interpret the results or to reproduce the study. For example, the representation of many chemical species not used in this study are described. Please can this be re-written to focus on the information needed to support the results and conclusion of this specific study.

We have shortened the model description, section 2.3, to:

“TOMCAT is a three-dimensional (3-D) off-line chemistry transport model (CTM; e.g. Chipperfield (2006)). ECMWF ERA-Interim meteorological analyses are used to force the model winds, temperature, and humidity (Dee et al., 2011). The standard TOMCAT tropospheric chemistry version uses 82 advected tracers and 229 gas-phase reactions (Emmonset al., 2015), which includes the extended tropospheric chemistry (ExTC) scheme (Monks et al., 2017). TOMCAT also includes heterogeneous N<sub>2</sub>O<sub>5</sub> hydrolysis using on-line size-resolved aerosol from the Global Model of Aerosol Processes (GLOMAP) model (Mann et al., 2010). The model anthropogenic emissions come from the Streets v1.2 inventory, which is a composite of several regional emissions inventories (Emmons et al., 2015). The MACCity inventory (Granier et al., 2011) is used for the natural emissions and biomass burning emissions come from the Global Fire Emissions Database (GFED) v3.1 inventory (Randerson et al., 2013). The model was initialised in December 2005, using a restart (initialisation) file from previous simulations, and run for 2006 to 2015 at the 2.8 ° × 2.8 ° spatial resolution (Monks et al., 2017).”

We still include some information about the number of reactions and provide the Monks et al., (2017) reference for the extended chemistry scheme as this will be important for ozone formation. The information of N<sub>2</sub>O<sub>5</sub> is also retained as this will be an important sink of NO<sub>x</sub> and thus PAN formation.

11. Page 8 line 20: How many satellite overpasses are used to create figure 2. Is the noisy data a result of the sampling frequency? If the satellite data were averaged over larger spatial areas would this help with the signal to noise problem?

For both NAO phases, the number of satellite overpasses range from about 30-50 in the southern half of the domain, while typically 0-15 in the northern part of the domain. Over the UK, Scotland typically

has approximately 10-20 observations and in southern England it ranges between 20-40. Therefore, the northern part of the domain has few observations (<10) and the signal is noisy and unreliable. However, south of 60°N the observations increase in frequency where more sensible spatial patterns can be seen. The data were mapped onto the 0.05° x 0.05° grid using a pixel slicing methodology to retain the majority of the information as discussed by Pope et al., (accepted, ASL). This reference will be added to the manuscript once it is published. The purpose of using the higher resolution data set was to get away from the problem of Eckhardt et al., (2003) where the low resolution of the GOME data led to a weak signal under the NAO+ phase. Here, we seen a response in the same order of magnitude (i.e.  $10^{15}$ ) as the seasonal average, which is statistically significant over parts of the UK.

In section 2.2 on P6 L11, we have added “The OMI TCNO<sub>2</sub> data is mapped onto a high resolution 0.05°x0.05° grid using the pixel slicing methodology of Pope et al., (accepted).”. Then on P7 L11 we have added “For OMI TCNO<sub>2</sub>  $n$  is typically greater than 20-30 observations per grid cell southwards of 60°N, while  $n$  ranges between 0 and 10 observations between 60-70°N. Therefore, the TCNO<sub>2</sub> signal is less robust northwards of 60°N.”.

12. Page 9 line 11: Do the authors have a physical mechanism to explain the lack of significant anomalies in fig 2d? The equivalent CTM simulation (fig 7d) shows significant positive anomalies across western Europe. What is the reason for this difference? Can the CTM be used to understand better the lack of relationship seen in the observations?

There are several potential reasons why this might be the case. Firstly, OMI has peak sensitivity to retrieving NO<sub>2</sub> in the mid-upper troposphere. Therefore, as the more stable conditions in NAO- are more likely to trap NO<sub>2</sub> lower down in the boundary layer where OMI has less sensitivity and might understate the absolute TCNO<sub>2</sub>. Secondly, as the satellite represents clear sky situations, the model may have an average longer NO<sub>2</sub> lifetime as cloudy conditions may reduce the photochemical loss of NO<sub>2</sub>. Therefore, we have added these potential limitations to our discussion in the manuscript. See P12 L10: “Potential reasons for model-satellite NAO- anomaly differences (Figure 2d and 6d) included: 1) As OMI has peak retrieval sensitivity in the mid-upper troposphere it potentially underestimates the full TCNO<sub>2</sub> under NAO- conditions when the more stable conditions trap NO<sub>2</sub> in the boundary layer, 2) The model NO<sub>2</sub> life time in the NAO- composite is potentially longer than the satellite equivalent as it represents all sky conditions, while the satellite composite represents clear sky conditions only (i.e. more photochemical loss of NO<sub>2</sub>).”.

13. Page 10 line 13 and page 14 line 16: How does the higher tropopause aid vertical transport of PAN into the UTLS? Is the UTLS a region that moves with the tropopause or is it defined to be a fixed altitude region?

Here we used the dynamical tropopause definition (i.e. +/-2 potential vorticity units) which is not fixed and will depend on vertical transport. If upwards vertical transport is enhanced, this will push the tropopause to a higher altitude and will more likely promote exchanges of tropospheric air masses into the UTLS (i.e. the air mass passes over the +/-2 PVU line). Therefore, in Figure 11c & d, one can see that the green line (zonally averaged tropopause across the Atlantic) is larger in NAO- when vertical transport in the mid-latitudes yields a higher tropopause and movement of PAN into the UTLS. This explains the PAN enhancements seen in Figures 3d and 10d. To make this clearer, we have reworded the text on P10 L13 to “The higher tropopause signifies enhanced vertical transport, which in this case, is the propagation of polluted air masses (i.e. large PAN content) from further down in the troposphere into the UTLS”. Secondly, we have changed the text on P14 L16 to “Vertical transport will also have an important impact in NAO+, as signified by the higher MIPAS-derived tropopause height (see SM), with propagation of polluted air masses, from the lower troposphere, into the UTLS”.

14. Page 14 line 29: Here the authors claim that the CTM PAN and satellite observed PAN have ‘some similarities’. Comparison of figures 3c and 10c, and 4c and 11c, show very different spatial patterns. What is the reason for this? Does this mean that the CTM cannot be used to diagnose the relationships seen in the observations as they cannot reproduce the broad features observed during different phases of the NAO?

We agree with the reviewer that the TOMCAT-MIPAS pattern are more similar in the UTLS under NAO-conditions. In terms of the absolute PAN spatial distributions Figure 3a and 10a do have similar patterns. However, there are discrepancies in the anomalies between Figure 3c and 10c. We disagree that the picture is different between 4c and 11c, however. Above 300 hPa (i.e. no information below this for MIPAS, so cannot compare with TOMCAT) the zonal anomalies are consistent with enhanced PAN anomalies between 300-200 hPa over latitudes 60-90°N and negative anomalies above 150 hPa. The reverse dipole with altitude between 30-50°N remains consistent as well. In Figure 3c and 10c, TOMCAT does simulate positive PAN anomalies, as seen by MIPAS, between 35-45°N and in the top right of the domain. There are also observed/simulated negative anomalies between 45-65°N, but we are not sure what is driving the spatial (zonal) disparity between the centre points of the negative anomaly clusters in Figures 3c and 10c. However, these are acknowledged on P15 L1-5. Therefore, we believe TOMCAT is a suitable model to diagnose the PAN response to the NAO (especially in NAO-). We have added the following text on P15 L5: “Therefore, the model results only allow for limited assessment of the NAO influence of UTLS PAN in NAO+ over these regions”.

15. Page 20 line 8: Please remove ‘successfully’ from this sentence. It is up to the reader, not the authors to judge the success of the paper.

Done. We have removed “successfully”.

#### References:

Creilson, J. K., Fishman, J., and Wozniak, A. E.: Intercontinental transport of tropospheric ozone: a study of its seasonal variability across the North Atlantic utilizing tropospheric 25 ozone residuals and its relationship to the North Atlantic Oscillation, *Atmospheric Chemistry and Physics*, 3, 2053–2066, doi:10.5194/acp-3-2053-2003, <https://www.atmos-chem-phys.net/3/2053/2003/>, 2003.

Eckhardt, S., Stohl, A., Beirle, S., Spichtinger, N., James, P., Forster, C., Junker, C., Wagner, T., Platt, U., and Jennings, S. G.: The North Atlantic Oscillation controls air pollution transport to the Arctic, *Atmospheric Chemistry and Physics*, 3, 1769–1778, doi:10.5194/acp-3-1769-2003, <http://www.atmos-chem-phys.net/3/1769/2003/>, 2003.

Hurrell, J. W.: Decadal Trends in the North Atlantic Oscillation: Regional Temperatures and Precipitation, *Science*, 269, 676–679, doi:10.1126/science.269.5224.676, <http://science.sciencemag.org/content/269/5224/676>, 1995.

Monks, S. A., Arnold, S. R., Hollaway, M. J., Pope, R. J., Wilson, C., Feng, W., Emmerson, K. M., Kerridge, B. J., Latter, B. L., Miles, G. M., Siddans, R., and Chipperfield, M. P.: The TOMCAT global chemical transport model v1.6: description of chemical mechanism and model evaluation, *Geoscientific Model Development*, 10, 3025–3057, doi:10.5194/gmd-10-3025-2017, <https://www.geosci-model-dev.net/10/3025/2017/>, 2017.

Osborn, T. J.: Recent variations in the winter North Atlantic Oscillation, *Weather*, 61, 353–355, doi:10.1256/wea.190.06, <http://dx.doi.org/10.1256/wea.190.06>, 2006.



Pausata, F. S. R., Pozzoli, L., Vignati, E., and Dentener, F. J.: North Atlantic Oscillation and tropospheric ozone variability in Europe: model analysis and measurements intercomparison, *Atmospheric Chemistry and Physics*, 12, 6357–6376, doi:10.5194/acp-12-6357-2012, <http://www.atmos-chem-phys.net/12/6357/2012/>, 2012.

Pope, R. J., Arnold, S. R., Chipperfield, M. P., Latter, B. G., Kerridge, B. J., and Siddans, R. Widespread changes in UK air quality observed from space. *Atmospheric Science Letters*, Accepted 2018.

Singh, H. B., Herlth, D., Kolyer, R., Chatfield, R., Viezee, W., Salas, L. J., Chen, Y., Bradshaw, J. D., Sandholm, S. T., Talbot, R., Gregory, G. L., Anderson, B., Sachse, G. W., Browell, E., Bachmeier, A. S., Blake, D. R., Heikes, B., Jacob, D., and Fuelberg, H. E.: Impact of biomass burning emissions on the composition of the South Atlantic troposphere: Reactive nitrogen and ozone, *J. Geophys. Res.-Atmos.*, 101, 24203–24219, doi:10.1029/96JD01018, 1996.

Thomas, M. A. and Devasthale, A.: Sensitivity of free tropospheric carbon monoxide to atmospheric weather states and their persistency: an observational assessment over the Nordic countries, *Atmospheric Chemistry and Physics*, 14, 11 545–11 555, doi:10.5194/5 acp-14-11545-2014, <http://www.atmos-chem-phys.net/14/11545/2014/>, 2014.

# Influence of the winter-time North Atlantic Oscillation on European tropospheric composition: an observational and modelling study

**Richard J. Pope<sup>1,2</sup>, Martyn P. Chipperfield<sup>1,2</sup>, Stephen R. Arnold<sup>1</sup>, Norbert Glatthor<sup>3</sup>, Wuhu Feng<sup>1,4</sup>, Sandip S. Dhomse<sup>1</sup>, Brian J. Kerridge<sup>5</sup>, Barry G. Latter<sup>5</sup>, and Richard Siddans<sup>5</sup>**

<sup>1</sup>School of Earth and Environment, University of Leeds, Leeds, UK

<sup>2</sup>National Centre for Earth Observation, University of Leeds, Leeds, UK

<sup>3</sup>Karlsruhe Institute of Technology, Institute of Meteorology and Climate Research, Karlsruhe, Germany

<sup>4</sup>National Centre for Atmospheric Science, University of Leeds, Leeds, UK

<sup>5</sup>Remote Sensing Group, STFC Rutherford Appleton Laboratory, Harwell Oxford, UK

Correspondence to: Richard Pope  
(r.j.pope@leeds.ac.uk)

## Abstract

We have used satellite observations and a simulation from the TOMCAT chemistry transport model (CTM) to investigate the influence of the well-known winter-time North Atlantic Oscillation (NAO) on European tropospheric composition. Under the positive phase of the NAO (NAO+NAO-high), strong westerlies tend to enhance transport of European pollution (e.g. nitrogen oxides,  $\text{NO}_x$ , carbon monoxide, CO) away from anthropogenic source regions. In contrast, during the negative phase of the NAO (NAO-NAO-low), more stable meteorological conditions lead to a build up of pollutants over these regions, relative to the winter-time average pollution levels. However, the secondary pollutant ozone shows the opposite signal of larger values during NAO+NAO+NAO-high. NAO-high introduces Atlantic ozone-enriched air into Europe while under NAO-NAO-low westerly transport of ozone is reduced yielding lower values over Europe. Furthermore, ozone concentrations are also decreased by chemical loss through the reaction with accumulated primary pollutants such as nitric oxide (NO) in NAO-NAO-low. Peroxyacetyl nitrate (PAN), in the upper troposphere-lower stratosphere (UTLS) peaks over Iceland/Southern Greenland in NAO-NAO-low, between 200-100 hPa, consistent with the trapping by an anticyclone at this altitude. Model simulations show enhanced PAN over Iceland/Southern Greenland in NAO-NAO-low is associated with vertical transport of polluted air from the troposphere-mid-troposphere into the UTLS. Overall, this work shows that NAO circulation patterns are an important governing factor for European winter-time composition and air pollution.

## 1 Introduction

Atmospheric circulation can play an important role in the transport and accumulation of air pollutants from and over source regions (e.g. Pope et al. (2014); Stohl (2006); Quinn et al. (2007)). This is most evident in the Northern Hemisphere winter/spring when emission of anthropogenic pollutants (e.g. nitrogen oxides ( $\text{NO}_x$ ) and carbon

monoxide (CO)) are largest (Edwards et al., 2004; Zhou et al., 2012), slower chemical loss mechanisms (i.e. photochemistry and reaction with OH) remove less pollution and winter-time dynamics are enhanced (more intense mid-latitude depressions and blocking systems (Trigo, 2006; Hurrell and Deser, 2010)). Over North America, the North Atlantic and Europe, the winter-time North Atlantic Oscillation (NAO) is one of the most prominent and frequent modes of atmospheric variability. It represents the redistribution of atmospheric mass between the Arctic and subtropical North Atlantic (Hurrell and Deser, 2010) controlling pressure gradients, wind flows, storm tracks and moisture budgets (Hurrell, 1995; Osborn, 2006). During the NAO positive phase (NAO+NAO-high), the climatological Icelandic low and Azores high pressure systems both intensify leading to enhanced westerly circulation (storm tracks) across the Atlantic into north-western Europe. The NAO negative phase (NAO-NAO-low) results in a weakening of this meridional pressure gradient leading to reduced westerly winds and a re-orientation of the storm tracks over southern continental Europe.

Previous studies have used a range of satellite observations and modelling tools to investigate the impact of NAO circulation patterns on tropospheric composition. Eckhardt et al. (2003) composited Global Ozone Monitoring Experiment (GOME) tropospheric column nitrogen dioxide (TCNO<sub>2</sub>) under the winter-time NAO finding an increase (decrease) of 3-5 (3-7) × 10<sup>14</sup> molecules/cm<sup>2</sup> in the NAO-(NAO+NAO-low (NAO-high) phase over Scandinavia/eastern Europe (UK and France). Thomas and Devasthale (2014), using Atmospheric Infrared Sounder (AIRS) CO at 500 hPa, found that NAO+ and NAO- NAO-high and NAO-low significantly increased (2.5%) and decreased (4%) CO concentrations over the Nordic countries, respectively. Creilson et al. (2003) investigated the links between the NAO and tropospheric ozone from the Total Ozone Mapping Spectrometer/Solar Backscattered Ultraviolet tropospheric ozone residual (TOR) product (1979-2000). They found the largest correlations between the NAO and TOR in winter/spring, where tropospheric ozone is larger by 3-5 DU (0-2 DU) over central-western Europe (Mediterranean) during the spring-time NAO+(NAO-NAO-high (NAO-low). Pausata et al. (2012) found that in December-January-

February (DJF) ~~NAO+~~ NAO-high significantly increases (90% confidence level) surface ozone by 6-10 ppbv over the UK and northern Europe, while ~~NAO-~~ NAO-low leads to a decrease of 4-10 ppbv. This is indicative of Atlantic ozone-rich air being transported into Europe under strong westerly flow during ~~NAO+~~ Under NAO-NAO-high. Under NAO-low, the weaker winds are ~~re-orientated~~ reorientated over southern continental Europe aiding the accumulation of primary pollutants (e.g. nitric oxide, NO), which acts as a substantial sink of ozone in winter. Bacer et al. (2016) and Christoudias et al. (2012) used modelled artificial CO/aerosol tracers, to find significant negative (positive) correlations between the NAO meteorological fields and composition over Europe (Canada). This highlighted the replacement of European pollution under ~~NAO+~~ NAO-high with clean Atlantic air, while pollution accumulated over continental Europe during ~~NAO-~~ NAO-low.

~~Here, we build upon previous work by using satellite measurements of tropospheric ozone~~ In this study, we aim to better constrain previously investigate relationships (e.g. NAO - TCNO<sub>2</sub>, Eckhardt et al. (2003)) and quantity unexplored relationships (e.g. vertical ozone profiles and upper troposphere — lower stratosphere (UTLS) peroxyacetyl nitrate (PAN) ~~to investigate the impact of the NAO circulation on tropospheric composition. We also analyse satellite measurements of TCNO<sub>2</sub> from the~~ between the NAO and atmospheric composition by utilising recent satellite observations with higher spatial resolution, more frequent sampling and smaller uncertainties (e.g. Ozone Monitoring Instrument (OMI) , which provides higher resolution and more frequent observations over a longer timer period than the GOME record used by Eckhardt et al. (2003) . The TCNO<sub>2</sub>) and simulations from the TOMCAT chemistry transport model (CTM)is utilised to help diagnose these relationships seen in the satellite data in order to understand key processes which govern. These tools allow for a more comprehensive assessment of recent interactions between the NAO and tropospheric composition, the correlation response between trace gases, the extent to which the NAO can influence UTLS composition and an understanding of the key processes governing pollution levels over ~~sources regions and populated areassource regions.~~ Section 2 discusses the

observations and model setup, Section 3 describes the links between satellite observed/model composition and the NAO and our discussion ~~/and~~ conclusions are presented in ~~Section~~ Sections 4 ~~/and~~ 5.

## 2 Observations and Model

### 2.1 North Atlantic Oscillation Index

Jones et al. (1997) define the North Atlantic Oscillation Index (NAOI) as “the normalised pressure at the southern location (i.e. Gibraltar) minus the normalised pressure at the Icelandic site (i.e. Reykjavik)”. The 2006-2015 ~~normalised~~ winter-time (DJF~~November-December-January-February~~, NDJF) NAOI time-series (normalised by the time-series standard deviation), obtained from the Climatic Research Unit (CRU), University of East Anglia, is plotted in Figure 1a. Here, significant ~~NAO+~~ and ~~NAO-~~ NAO-high and NAO-low phases occur when the time-series is greater or less than 1.0 and -1.0 standard deviations (blue dotted lines), respectively. However, the multiple satellite records used in this study to assess the composition-circulation relationships all cover different time periods, so the NAO phases are determined based on their corresponding NAOI time-series. We then compare the satellite composition-circulation relationships with the model relationships for the 2006-2015 period. Satellite data also have periods of missing data, especially in winter, so the season is extended in some cases (e.g. includes November) to build up a sizeable satellite composite for more robust signals.

Figures 1b-e show the pressure anomalies, relative to the DJF-NDJF 2006-2015 average, and winds under both NAO phases at the surface and 10 km derived from European Centre for Medium-Range Weather Forecasts (ECMWF) ERA-Interim data. Under NAO+ NAO-high (Figure 1b), the Icelandic low pressure system intensifies by 5-10 hPa at the surface. Over the subtropical North Atlantic, surface pressure increases by 3-5 hPa, yielding a stronger meridional Atlantic pressure gradient. Therefore, en-

hanced westerly winds (i.e. storm tracks) peaking over 10 m/s are orientated over north-western Europe. Green polygonned regions show significant differences (99% [confidence level](#)) between NAO composite pressure and the [DJF-NDJF](#) average using the Wilcoxon Rank Test (WRT, Pirovano et al. (2012)). [NAO-NAO-low](#) (Figure 1c) shows the opposite pattern, with significant positive (negative) pressure anomalies of 5-15 hPa over the Southern Greenland/Iceland (subtropical North Atlantic). The pressure anomaly reversal yields a weaker meridional pressure gradient, slower easterly winds (below 10 m/s) between 50-60°N and southwards shift in the storm tracks. At 10 km, the spatial structure and significance of the pressure anomalies are similar to the surface, but with smaller absolute differences (i.e. as pressure decreases with altitude). The more uniform westerly flow (Figure 1d) peaks at approximately 40 m/s. Under [NAO-NAO-low](#) (Figure 1e) the 10 km westerlies are over the sub-tropical North Atlantic with weakened flow (approximately 10 m/s) over the mid-North Atlantic.

## 2.2 Satellite Observations

To investigate the links between tropospheric composition and the NAO, we have used satellite measurements of TCNO<sub>2</sub>, tropospheric ozone profiles (and sub-columns, 0-6 km) and UTLS PAN. TCNO<sub>2</sub> (DOMINO product v2.0; Boersma et al. (2011b)) for 2005 to 2015 comes from OMI, on-board NASA's AURA satellite (2004 - present), with a sun-synchronous overpass of approximately 13.30 local time (LT). OMI is nadir-viewing with a spectral range of 270-500 nm and pixel footprint sizes of 16-23 km and 24-135 km along and across track, respectively (Boersma et al., 2007). A full description of the OMI NO<sub>2</sub> retrieval is discussed by Eskes and Boersma (2003). Individual retrievals were screened for poor data quality flags, geometric cloud fraction greater than 0.2 and the OMI row anomalies (Braak, 2010). [We primarily use OMI TCNO<sub>2</sub> data as the instrument has a much higher spatial resolution and sampling than the GOME TCNO<sub>2</sub> data used by Eckhardt et al. \(2003\). The OMI TCNO<sub>2</sub> data is also mapped onto a high resolution 0.05°x0.05° grid using the pixel slicing methodology of Pope et al. \(Accepted\). Therefore, we use OMI to build upon the work of Eckhardt et al. \(2003\)](#)

and explore whether we can detect a more robust TCNO<sub>2</sub>-NAO signal, which is challenging given the short lifetime of NO<sub>2</sub>.

Tropospheric ozone measurements used here are from the Tropospheric Emission Spectrometer (TES) on-board the NASA's AURA satellite. TES is an infrared Fourier transform spectrometer that measures thermal emissions over the spectral range of 650 - 2250 cm<sup>-1</sup> and has a nadir-viewing footprint of 45 km<sup>2</sup> (Richards et al., 2013). TES has peak sensitivity to lower tropospheric ozone at approximately 850 hPa (Worden et al., 2013). The TES data has also been screened for poor data quality flags. Previous studies of the NAO impacts on ozone have only used satellite tropospheric column data either directly or to evaluate model simulations. Therefore, the vertical ozone profiles retrieved by TES provide the opportunity to better understand the vertical response of ozone from NAO circulation patterns.

The Michelson Interferometer for Passive Atmospheric Sounding (MIPAS) operated onboard ESA's ENVISAT satellite between 2002-2012 and measured many trace gases including PAN in the UTLS. ENVISAT was a sun-synchronous polar-orbiting satellite, which performed 14.4 orbits per day, crossing the equator at about 10:00 am and 10:00 pm LT. MIPAS was a limb-viewing emission spectrometer covering the spectral region between 685 and 2410 cm<sup>-1</sup> (Fischer et al., 2008), which produced up to 1400 profiles each day. The measurements, in reduced resolution nominal mode, had 27 tangent altitudes per limb scan. The lowermost (uppermost) tangent altitudes ranged approximately from 5 km (70 km) near the poles to 12 km (77 km) at the equator (Wiegele et al., 2012). ~~The data was retrieved~~ Few studies have directly used satellite measurements of composition to investigate the influence of the NAO on UTLS trace gas distributions. This is the first study to use satellite retrieved UTLS PAN (from the Karlsruhe Institute for Technology (KIT) ~~for the full satellite mission (full spectral resolution - V5H see SM), 2002-2004 and reduced spectral resolution - V5R, 2005-2012).~~ The full file type list is 2002: V5H\_PAN\_20, 2003: V5H\_PAN\_20, 2004: V5H\_PAN\_20, 2005: V5R\_PAN\_220, 2006: V5R\_PAN\_220, 2007: V5R\_PAN\_220, 2008: V5R\_PAN\_220, 2009: V5R\_PAN\_220, 2010: V5R\_PAN\_220, 2011: V5R\_PAN\_220/1 and 2012: V5R\_PAN\_2



which has a lifetime of several months (Singh et al., 1996), to investigate the impact of NAO tropospheric circulation patterns on UTLS composition.

In terms of satellite errors and uncertainties, the random errors are primarily assessed when compositing different chemical species under the two NAO phases. ~~The~~  
5 When each chemical species is sampled under the NAO phases and then compared with the seasonal (winter-time) average, the anomalies (i.e. NAO composite – seasonal average) will be dominated by random errors as the systematic errors will cancel considerably ~~when comparing species-NAO composites to their winter-time averages.~~ The averaging of daily data will reduce the random error component by a factor of  $1.0/\sqrt{n}$ ,  
10 where  $n$  represents the number of days with good quality satellite data. For example, OMI TCNO<sub>2</sub>  $n$  is typically greater than 20-30 observations per grid cell southwards of 60°N, while  $n$  ranges between 0 and 10 observations between 60-70°N. Therefore, the TCNO<sub>2</sub> signal is less robust northwards of 60°N. The random errors of the different species under both NAO phases is discussed further in the supplementary material  
15 (SM). However, over the North Atlantic and western Europe, OMI TCNO<sub>2</sub> ,MIPAS PAN 150 hPa and TES lower tropospheric ozone random errors range ~~from between~~ approximately 10-40%~~,-~~. For MIPAS PAN at 150 hPa the random errors peak at 15-20%and are , while ranging between 10-20% ~~over the North Atlantic and western Europe for TES lower tropospheric ozone.~~ Boersma et al. (2004), Glatthor et al. (2007) and Richards  
20 et al. (2008) provided detailed discussion on these product uncertainties, respectively.

### 2.3 TOMCAT 3-D Model

TOMCAT is a three-dimensional (3-D) off-line chemistry transport model (CTM; ~~e.g. Chipperfield et al. (1993); Stockwell and Chipperfield (1999); Chipperfield (2006).~~ ECMWF ERA-Interim meteorological analyses are used to force the model winds, temperature, and humidity (Dee et al., 2011). The standard TOMCAT tropospheric chemistry version uses 82 advected tracers and 229 gas-phase reactions (Emmons et al.,  
25 2015), which includes the extended tropospheric chemistry (ExTC) scheme ~~.The VOG degradation chemistry scheme incorporates the oxidation of monoterpenes, C2-C4~~

alkanes, toluene, ethene, propene, acetone, methanol and acetaldehyde, which was implemented by Monks et al. (2017). The model chemistry scheme includes the Mainz condensed isoprene oxidation mechanism (MIM) (Pöschl et al., 2000). (Monks et al., 2017)

TOMCAT also includes heterogeneous  $\text{N}_2\text{O}_5$  hydrolysis using on-line size-resolved aerosol from the Global Model of Aerosol Processes (GLOMAP) model (Mann et al., 2010). Aerosol types have individual uptake coefficients as parameterized by Evans and Jacob, with the exception of dust which is based on Mogili et al. (2006). Tracer advection by the resolved winds is performed using the scheme of Prather (1986). Subgrid scale transport is performed using the Tiedtke convection scheme (Tiedtke, 1989; Stockwell and Chamey and the Holtslag and Boville (1993) parameterization for turbulent mixing in the boundary layer following the method of Wang et al. (1999). Where available, kinetic data are taken from IUPAC (<http://www.iupac-kinetic.ch.cam.ac.uk>) and for other reactions, we use the Leeds Master Chemical Mechanism (MCM). The model anthropogenic emissions come from the Streets v1.2 inventory, which is a composite of several regional emissions inventories (Emmons et al., 2015). The MACCity inventory (Granier et al., 2011) is used for the natural emissions and biomass burning emissions come from the Global Fire Emissions Database (GFED) v3.1 inventory (Randerson et al., 2013). The model was initialised in December 2005, using a restart (initialisation) file from previous simulations, and run for 2006 to 2015 at the  $2.8^\circ \times 2.8^\circ$  spatial resolution (Monks et al., 2017). [Here, the TOMCAT simulations help to diagnose the key processes governing the satellite derived NAO-composition relationships by providing information \(e.g. the surface\) where the satellite instruments cannot detect trace gases and offers full spatial/temporal data coverage.](#)

### 3 Results

#### 3.1 Observations of Tropospheric Composition

##### 3.1.1 Nitrogen Dioxide

OMI TCNO<sub>2</sub> was sampled under the winter-time (November - February) **NAO+** NAO-high (Figure 2a) and **NAO-** NAO-low (Figure 2b) for 2005-2015. Peak TCNO<sub>2</sub> concentrations (over  $15 \times 10^{15}$  molecules/cm<sup>2</sup>) in both phases are over the Po Valley and the Benelux region. Over the UK, source region TCNO<sub>2</sub> ranges between  $7-13 \times 10^{15}$  molecules/cm<sup>2</sup> and  $6-10 \times 10^{15}$  molecules/cm<sup>2</sup> in **NAO-** and **NAO+** NAO-low and NAO-high, respectively. We hypothesise that **NAO+** NAO-high enhanced westerly flow transports NO<sub>2</sub> off the UK mainland, as seen by Pope et al. (2014) who investigated the impacts of cyclonic conditions on UK TCNO<sub>2</sub>. Figure 2c supports this, highlighting significant negative anomalies of  $-4$  to  $-2 \times 10^{15}$  molecules/cm<sup>2</sup> between the TCNO<sub>2</sub> **NAO+** NAO-high composite and 11-year winter-time average. Significant anomalies, shown in the green polygonned regions, are based on the WRT at the 95% confidence level and where composite and winter-time averages  $\pm$  their respective random errors (Pope et al., 2015) do not overlap. Systematic errors will cancel when differencing the two TCNO<sub>2</sub> composites. **NAO-** NAO-low reduces westerly flow across Europe and might be expected to aid TCNO<sub>2</sub> accumulation, but there is actually little change in the anomaly field (Figure 2d). Only the Benelux region ( $3-5 \times 10^{15}$  molecules/cm<sup>2</sup>) and North Sea ( $-2.0$  to  $-1.0 \times 10^{15}$  molecules/cm<sup>2</sup>) show significant anomalies linked to NO<sub>2</sub> accumulation and reduced transport off the UK mainland.

##### 3.1.2 Peroxyacetyl Nitrate

The MIPAS PAN 200-100 hPa average volume mixing ratio, sampled under **NAO+** NAO-high (DJF) between 2002-2012 (Figure 3a), shows peak (minimum) PAN concentrations of 50-55 (10-20) pptv in the sub-tropical North Atlantic (over Newfoundland

and the Canadian Arctic). During ~~NAO-NAO-low~~ (Figure 3b), PAN concentrations are lower over the sub-tropical Atlantic, but slightly larger over Newfoundland/the Canadian Arctic between ~~30-45~~ 25-40 pptv. PAN concentrations are also larger (approximately 40 pptv) over Iceland/Southern Greenland/Denmark Strait leaving a spatially prominent feature. MIPAS-derived tropopause height (see SM) peaks at 11 km in this region while it is only 9-10 km in the surrounding area (excluding the sub-tropical North Atlantic). There is also an increase in pressure and convergence of winds over this region (Figure 1d) potentially highlighting the impact of ~~NAO-NAO-low~~ vertical transport of PAN into the UTLS; this is investigated further using TOMCAT (see Section 3.2.2). In Figure 3c under ~~NAO+NAO-high~~, peak significant anomalies of 5-15 pptv occur over the sub-tropical Atlantic and ~~Arctic region northwards of 70°N~~ north-eastern Arctic region (top right of the domain). There are also significant negative anomalies (~~-5 to -1~~ -15 to -5 pptv) over the Quebec region. Significant anomalies are based on the WRT (95% confidence level) and where the NAO composite and the winter-time averages  $\pm$  their uncertainty ranges do not overlap. Over Iceland/Greenland (sub-tropical North Atlantic and Europe), there are positive (negative) anomalies of 5-15 (-5 to -1) pptv in ~~NAO-NAO-low~~.

Figure 4 shows the zonally averaged ( $90^{\circ}$ - $20^{\circ}$ E) vertical profiles of MIPAS PAN under the two NAO phases. Peak PAN concentrations at 300-250 hPa range between 100 and 130 pptv in both phases, but are larger in ~~NAO-NAO-low~~ between  $30$ - $50^{\circ}$ N by 10-20 pptv. However, northwards of  $70^{\circ}$ N, PAN concentrations between 225 and 100 hPa tend to be larger under ~~NAO+NAO-high~~ conditions. Figure 4c shows the ~~NAO+NAO-high~~ zonal anomalies relative to the winter-time average (hatched anomalies are insignificant based on the WRT - 95% confidence level). Northwards of  $50^{\circ}$ N, significant positive anomalies (5-15 pptv) exist between ~~300-100~~ 300-125 hPa. MIPAS derived tropopause height under ~~NAO+NAO-high~~ (see SM) is typically higher than in ~~NAO-NAO-low~~ over the North Atlantic and Europe by 1-2 km. ~~Therefore, the higher tropopause potentially aids vertical transport into the UTLS, which promotes elevated PAN concentrations originating~~ The higher tropopause signifies enhanced

vertical transport, which in this case, is the propagation of polluted air masses (i.e. large PAN content) from further down in the troposphere into the UTLS. Southwards of 50°N, positive anomalies occur between 200-100 hPa, while negative anomalies are found between 300-250 hPa. Under NAO-NAO-low conditions (Figure 4d), there are significant positive anomalies (5-15 pptv) at 300-275 hPa between 60-90°N and they reach up to 125 hPa at 50-70°N coinciding with peak PAN concentrations over Iceland in Figure 3b. Significant negative anomalies (-5 to -1 pptv) exist at 225-50 hPa which coincide with the negative anomalies in Figure 3d over the sub-tropical Atlantic. Between 30-50°N, there is an altitude anomaly dipole reversal with NAO+NAO-high showing significant positive (negative) anomalies at 200-100 hPa (300-250 hPa) and NAO-NAO-low highlighting significant positive (negative) anomalies at 300-275 hPa (225-50 hPa). These patterns are linked to changes to regional circulation patterns under the different NAO phases and will be explored further using TOMCAT in Section 3.2.2.

### 3.1.3 Ozone

Figure 5 shows TES vertical profiles averaged over four regions (Zones 1-4) covering the North Atlantic, between 2005 and 2011, sampled during significant winter-time (November-February) NAO events. These four domains are selected because TES has infrequent spatial sampling (Richards et al., 2008) meaning spatial ozone distributions are often noisy/unclear. In Zone 1 (UK), TES ozone sampled under NAO+NAO-high (red line) is significantly larger (90% - squares and 95% -diamonds- diamonds) than in NAO-NAO-low (blue line) by 3-4 ppbv throughout the region of peak sensitivity (900-650 hPa - yellow box). Similar patterns exist in surface ozone measurements from the UK Automated Urban and Rural Network (AURN, DEFRA (2015)). Under NAO+NAO-high, surface ozone concentrations were significantly higher than in NAO-NAO-low by 5-10  $\mu\text{g}/\text{m}^3$  across the UK (see SM). The opposite is true for AURN surface  $\text{NO}_2$  where concentrations across the UK are lower by 5-10  $\mu\text{g}/\text{m}^3$  in NAO+NAO-high. This supports the hypothesis that NAO+NAO-high increases (decreases) ozone con-

centrations over western Europe (western Atlantic) through enhanced westerly transport of ozone and dispersion of other species involved in its removal (e.g. NO) over Europe. Zone 2 (Newfoundland) has the opposite signal where the [NAO-NAO-low](#) ozone profile is significantly (95%) larger by 2-4 ppbv than the [NAO+NAO-high](#) profile. Again, this is potentially linked to enhanced westerly ozone transport across the Atlantic towards Europe during [NAO+NAO-high](#). In Zone 3 (North Atlantic), there are insignificant differences at approximately 900 hPa, however, ozone is significantly greater under [NAO-NAO-low](#) between 875-350 hPa. There are insignificant differences in Zone 4 ozone up to 600 hPa, but [NAO+NAO-high](#) ozone is significantly larger above this altitude.

## 3.2 Model [Composition](#) Results

TOMCAT has been evaluated in multiple studies (e.g. Monks et al. (2017); Richards et al. (2013)) for NO<sub>2</sub>, PAN and ozone, which is discussed in detail in the SM. We also have evaluated TOMCAT surface/tropospheric ozone against a range of observations covering western Europe and the North Atlantic. In all cases, TOMCAT has suitable skill to represent these chemical tracers and their responses to the NAO circulation patterns ([see SM](#)).

### 3.2.1 Nitrogen Dioxide

In [NAO+ and NAO-NAO-high and NAO-low](#) (Figure 6a & b), where TOMCAT has been sampled under the NAO phases in Figure 1a, the model TCNO<sub>2</sub> over western Europe ranges between 3 to 9 × 10<sup>15</sup> [molecules/cm<sup>2</sup>](#) and 6 to over 10 × 10<sup>15</sup> [molecules/cm<sup>2</sup>](#), respectively. Over the UK, [NAO+NAO-high](#) enhanced westerly flow transports NO<sub>2</sub> off the mainland (Figure 6c) with significant negative anomalies of -2.0 to -0.5 × 10<sup>15</sup> [molecules/cm<sup>2</sup>](#), relative to the winter-time average. OMI TCNO<sub>2</sub> has a similar [NAO+NAO-high](#) UK signal (2c), but it is less spatially extensive and does not cover as much of continental Europe. In [NAO-NAO-low](#), OMI (Figure 2d) only shows accumulation

of TCNO<sub>2</sub> over the Benelux region, while TOMCAT (positive anomalies over  $1.5 \times 10^{15}$  molecules/cm<sup>2</sup>) accumulates TCNO<sub>2</sub> over all of continental Europe (Figure 6d). Potential reasons for model-satellite NAO-low anomaly differences (Figure 2d and 6d) included: 1) As OMI has peak retrieval sensitivity in the mid-upper troposphere it potentially underestimates the full TCNO<sub>2</sub> under NAO-low conditions when the more stable conditions trap NO<sub>2</sub> in the boundary layer, 2) The model NO<sub>2</sub> life time in the NAO-low composite is potentially longer than the satellite equivalent as it represents all sky conditions, while the satellite composite represents clear sky conditions only (i.e. more photochemical loss of NO<sub>2</sub>).

At the surface, TOMCAT surface NO<sub>2</sub> ranges between 0-6 ppbv and 2-8 ppbv in NAO+ and NAO-NAO-high and NAO-low, respectively. TOMCAT does have a systematic surface NO<sub>2</sub> low bias against surface observations (see SM), but this systematic offset is removed when considering anomalies (Figure 8c & d), relative to the winter-time average. TOMCAT surface anomalies typically have similar spatial patterns to the TOMCAT TCNO<sub>2</sub>, but they are less spatially extensive. Under the NAO+NAO-high, there are significant negative (positive) anomalies of -0.5 (0.2) ppbv over the UK (North Sea) highlighting the westerly transport of NO<sub>2</sub> off the UK mainland. Under NAO-NAO-low, significant positive anomalies (0.0 to 1.0 ppbv) highlight the accumulation of NO<sub>2</sub> from reduced westerly flow across the UK. This is consistent with the AURN results presented in the SM. The model also shows a significant anomaly dipole over Scandinavia which reverses between phases. This, in combination with the reduced spatial impact on surface NO<sub>2</sub> compared with the tropospheric pattern, implies that processes above the surface also influence the response of the tropospheric NO<sub>2</sub> distribution to the NAO.

Figure 8 shows the TOMCAT NO<sub>2</sub> meridional-vertical cross-section at 0°E. Between 35-60°N TOMCAT simulates NO<sub>2</sub> concentrations above 1.0 ppbv from 1000 hPa to 900 (800850) hPa in NAO+ (NAO-NAO-high (NAO-low)). Negative anomalies (under -0.2 -0.05 ppbv), relative to the winter-time average, from 1000-900 hPa at 50°N (Figure 8c) show the enhanced NAO+NAO-high westerly flow transporting NO<sub>2</sub> through-

out the boundary layer away from UK source regions. This  $\text{NO}_2$  is transported into the North Sea yielding positive biases of  $0.1$ – $0.02$  ppbv northwards of  $55^\circ\text{N}$  with vertical ascent into the mid-troposphere (approximately 600-700 hPa at  $60$ – $70^\circ\text{N}$ ). Under  $\text{NAO}$ – $\text{NAO-low}$  (Figure 8d), there are positive ( $0.2$  above  $0.05$  pptv) anomalies between  $40$ – $55$ – $35$ – $65^\circ\text{N}$  as the weakened meridional winds have a southerly flow with ascent (descent) at  $65$  ( $40$ ) $^\circ\text{N}$ . This highlights reduced  $\text{NO}_2$  transport from the climatological westerlies aiding accumulation in the lower troposphere (1000-700 hPa). Therefore, processes throughout the lower troposphere over the UK are important in governing the tropospheric column burden during the two NAO phases.

### 3.2.2 Peroxyacetyl Nitrate

At the surface, although PAN has lower concentrations than  $\text{NO}_2$  in source regions, it has a longer lifetime resulting in more significant responses to the seasonal average under the different NAO phases. Under  $\text{NAO+}$ – $\text{NAO-high}$  (Figure 9a), TOMCAT surface PAN peaks between 200-220 pptv over the Western Atlantic. Over Europe, PAN ranges between 150-170 pptv as, like  $\text{NO}_2$ , enhanced westerly flow transports PAN away from western European source regions replacing it with cleaner sub-tropical North Atlantic air (100-150 pptv). Through reduced transport,  $\text{NAO}$ – $\text{NAO-low}$  conditions aid pollutant accumulation over continental Europe with PAN concentrations of 190 to over 300 pptv. The  $\text{NAO+}$ – $\text{NAO-high}$  TOMCAT PAN anomalies (Figure 9c), relative to the winter-time average, highlight reduced concentrations of  $-50$  to  $-20$  pptv over continental Europe, while in the western North Atlantic there are no significant anomalies. This infers similar transport processes to the winter-time average resulting in minimal PAN changes, yet  $\text{NAO}$ – $\text{NAO-low}$  (Figure 9d) weakens/reverses the winds yielding significant negative anomalies of  $-20$  to  $-10$  pptv. Therefore, westerly flow, similar under  $\text{NAO+}$ – $\text{NAO-high}$  and average winter-time conditions, aids the long-range transport of PAN from North America. As  $\text{NAO}$ – $\text{NAO-low}$  interrupts this transport pathway, there is a significant decrease in background PAN.

We now investigate whether TOMCAT reproduces the MIPAS UTLS PAN patterns



under the NAO phases, despite the slightly different time periods. Previous studies (e.g. Emmons et al. (2015); Pope et al. (2016)) have shown that TOMCAT PAN compares reasonably well with aircraft observations, but there is a systematic difference between TOMCAT and KIT MIPAS PAN (see SM). Therefore, we primarily focus on the anomalies, relative to the winter-time average, under the NAO phases as this systematic difference is removed. TOMCAT PAN 200-100 hPa average peaks (over 50 pptv), in ~~NAO+~~NAO-high, over the western subtropical North Atlantic (Figure 10a). The south-westerly flow (approximately 30 m/s) at this altitude transports PAN across the Atlantic reaching 35 pptv over Iberia. However, at approximately 0°E, a southerly shift in the winds over the Mediterranean leads to lower continental Europe PAN concentrations (20-30 pptv). Northwards of 70°N, the flow (20-30 m/s) accumulates PAN over the Arctic region (20-24 pptv). Similar spatial patterns are seen in MIPAS with peak PAN concentrations over the westerly sub-tropical Atlantic, minimum PAN over Canada/Hudson Bay and elevated PAN in the Arctic region. However, MIPAS PAN absolute concentrations are systematically ~~larger~~higher than TOMCAT (see SM). Vertical transport will also have an important impact ~~as in NAO-high, as signified by the higher MIPAS-derived tropopause height in NAO+~~as in NAO-high, as signified by the higher MIPAS-derived tropopause height in NAO+ (see SM) ~~allows for the uplift of PAN into this altitude range. In NAO-, with propagation of polluted air masses, from the lower troposphere, into the UTLS. In NAO-low,~~ peak PAN (over 40 ppbv) occurs in the sub-tropical Atlantic where the winds are predominately zonal (westerly) yielding lower PAN concentrations (15-25 pptv) over the mid-North Atlantic. Continental Europe PAN concentrations have decreased (10-20 pptv), as north-westerly flow is transporting cleaner Arctic air masses into the region. PAN accumulation over Iceland and Southern Greenland (25 ppbv) correlates with the large UTLS pressure increase shown in Figure 1d. Figure 10d highlights the significant enhancement of PAN over Iceland/Southern Greenland with positive anomalies, relative to the winter-time average, of 5-10 pptv. Again, the MIPAS-derived tropopause height in ~~NAO-~~NAO-low peaks in this region (approximately 11 km - see SM) suggesting sufficiently strong vertical transport of tropospheric air masses. In ~~NAO-~~NAO-low, as the strong westerly flow in

NAO+NAO-high (Figure 10b) has shifted equator-wards, there are significant negative anomalies under -15 pptv across the North Atlantic, which match the MIPAS equivalent in Figure 3d. There are some similarities between the TOMCAT (Figure 10c) and MIPAS (Figure 3c) NAO+NAO-high PAN anomalies with increased PAN in the eastern Arctic. However, TOMCAT simulates insignificant positive anomalies (0-2-0-5 pptv) over the North Atlantic between 35-45°N while MIPAS has significant positive anomalies (of 10 ppbv). TOMCAT (MIPAS) also simulates (observes) pptv. TOMCAT also simulates significant negative anomalies over the UK/western North Atlantic(northern Canada)eastern North Atlantic, which are not seen (simulated) by MIPAS(TOMCAT). observed by MIPAS. Therefore, the model results only allow for limited assessment of the NAO influence of UTLS PAN in NAO-high over these regions.

Figure 11 shows the zonal average (90°W-20°E) meridional-vertical TOMCAT PAN distribution under both NAO phases. Between 1000 and 600 hPa, PAN concentrations are above 200 pptv apart from in the region 30-40°N. From 400-200 hPa, there is a sharp PAN decrease to less than 30 pptv. The vertical PAN profile between 30-40°N differs from other latitude bands with PAN peaking at 150-200 pptv from 1000-700 hPa and then 60-100 pptv up to 200 hPa. Between 200-100 hPa, PAN concentrations (30-60 pptv) are larger than other latitude bands linked to the higher tropopause (also observed by MIPAS - see SM). The significant decreases in surface PAN over Europe from NAO+NAO-high enhanced westerly flow (Figure 9c) occur throughout the troposphere with negative zonal anomalies of -10 to -3 pptv (Figure 11c). Above the tropopause (dashed green line), strong vertical (w winds are scaled by 10<sup>4</sup> for clarity) - meridional transport accumulates PAN (positive anomalies of 3-6 over 10 pptv) in Arctic UTLS. Under NAO-NAO-low (Figure 11d), there are positive (5-10 pptv) and negative (-10 to -5 pptv) anomalies between 30-50 and 60-90°N throughout the troposphere. The surface patterns (Figure 9d), where reduced transport aids PAN accumulation over Europe, appear to account for this zonal tropospheric pattern. Between 30-50°N, there is limited meridional flow aiding PAN accumulation over Europe in NAO-NAO-low. The vertical flow contributes to positive anomalies (3-5 pptv) propagating into the UTLS

consistent with PAN accumulation shown in Figure 10d between 50-70°N.

### 3.2.3 Ozone

TOMCAT surface ozone under **NAO+NAO-high** (Figure 12a) peaks at approximately 28-30 ppbv over sub-tropical and western North Atlantic co-located with the enhanced westerlies. Over continental Europe, ozone concentrations are significantly larger (1-2 ppbv - Figure 12c) than the winter-time average ranging between **13-22-13-25** ppbv. This matches a similar pattern in the observations; AURN surface ozone was significantly higher over the UK under **NAO+ than NAO-NAO-high than NAO-low** (SM) and TES lower tropospheric ozone (Zone 1, Figure 5) was larger under **NAO+NAO-high**. In Zone 2, TES lower tropospheric ozone was higher under **NAO-NAO-low**, which correlates with the surface TOMCAT pattern. Pausata et al. (2012) found similar patterns with significant positive (negative) correlations over Europe (western North Atlantic) between surface ozone and the NAOI in DJF. Under **NAO-NAO-low** conditions, TOMCAT ozone concentrations are consistent across the North Atlantic (28-30 ppbv) as the weakened/reversed westerlies limit the transport of ozone-enriched Atlantic into Europe yielding lower concentrations of **13-16-13-20** ppbv. Over the western North Atlantic (Europe), ozone concentrations (Figure 12d) have increased (decreased) with significant positive (negative) anomalies of 2-3 ppbv (-3 to -1 pptv). Again, Pausata et al. (2012) presented similar results which also match TES and AURN ozone observations (see SM). TOMCAT tropospheric column ozone (not shown here) also showed similar anomalies.

At the surface, the PAN and NO<sub>2</sub> spatial anomalies are anti-correlated with ozone, so UTLS ozone (Figure 13) was investigated to see if this relationship was consistent at higher altitudes. TOMCAT 200-100 hPa average ozone, sampled under **NAO+NAO-high**, ranges from 800 to 1000 ppbv northwards of 60°N but decreases towards the sub-tropical North Atlantic with minimum concentrations of 150-200 ppbv. A similar pattern occurs under **NAO-NAO-low** except for the ozone reduced air mass (500-700 pptv) stretching from approximately 45-65°N along 15-45°W. Higher ozone concentrations

(800-1000 ppbv) also propagates further south in ~~NAO-NAO-low~~ on either side of the Atlantic surrounding the reduced ozone limb. The UTLS ozone anomalies (Figure 13c & d) are also anti-correlated with the PAN. Whereas PAN has positive (~~mainly non-significant~~) anomalies across the Atlantic basin in ~~NAO+NAO-high~~, there are significant negative ozone anomalies (~~under -100 to -30~~ ppbv). ~~Over the UK/eastern North Atlantic, TOMCAT simulates significant negative PAN anomalies, while the ozone anomalies are positive (non-significant).~~ This anti-correlation is ~~more prominent under NAO-also prominent under NAO-low~~, where significant TOMCAT ozone anomalies (50-200 ppbv) exist over the mid-North Atlantic and Europe, while significantly negative for PAN. As shown in Figures 10 and 11, tropospheric positive PAN anomalies propagate into the UTLS over Iceland/Southern Greenland, but the ozone anomalies are significantly negative (-150 to -50 ppbv). Potential reasons for the PAN-ozone anti-correlation include the air mass origin or the PAN ( $\text{NO}_x$ )-ozone chemistry. The thermal decomposition of PAN forms the peroxyacetyl radical and  $\text{NO}_2$ , which is an UTLS ozone sink (i.e. conversion of  $\text{NO}_2$  to NO and then reaction with ozone) while a tropospheric ozone source in the presence of volatile organic compounds (Richards et al., 2013). However, lower UTLS temperatures (i.e. around 250 K) yield a PAN lifetime of several months (Singh, 1987) and a less likely factor in the PAN/ $\text{NO}_x$ -ozone anomaly anti-correlations. Cohen et al. (1994) show that UTLS ozone- $\text{HO}_x$  chemistry is a more significant sink pathway for ozone, however, there is no clear correlation between the NAO  $\text{HO}_2$  and ozone anomalies. Methane, a good air mass tracer due to its approximate 9-year lifetime (e.g. McNorton et al. (2016)) and anthropogenic source, was sampled under the NAO phases (not shown) and highlighted similar anomaly patterns to PAN, again anti-correlated with ozone. Therefore, PAN and methane (ozone) act as signatures for the transport of polluted (clean) air masses in the troposphere for the different NAO phases.

Figure 14 shows the TOMCAT ozone cross-section at  $0^\circ\text{E}$ , similar to  $\text{NO}_2$  in Figure 8. Under both NAO phases, lower-tropospheric (UTLS - above 300 hPa) ozone ranges between 25-35 (above 100) ppbv. Meridionally, there is a decreasing poleward lower

5 tropospheric ozone gradient, while in the UTLS peak (minimum) concentrations are at the pole (30°N). The anomalies, as discussed above, are anti-correlated with NO<sub>2</sub>. In NAO+NAO-high, there are small positive (negative) anomalies over the UK (North Sea) consistent with ozone-enriched air transported into the UK from the North Atlantic and ozone loss downwind due to source region NO<sub>x</sub> transport, which propagate up to approximately 600 hPa. The positive anomalies in the UTLS at 60°N are consistent with ozone accumulation seen in Figure 13. Under NAO-NAO-low conditions, the negative anomalies (approximately -3 ppbv) between 45-65°N and 1000-700 hPa are linked to UK NO<sub>x</sub> accumulation (Figure 7d). Atmospheric downwelling leads to UTLS ozone (positive anomalies over 3 ppbv) propagation into the mid-troposphere at 40-10 50°N. At high latitudes, small positive anomalies throughout the troposphere, which are anti-correlated with PAN, show clean air transport around the UTLS Icelandic-Southern Greenland anticyclone in which PAN accumulates.

15 A second TOMCAT ozone cross-section, at 56.25°W (Figure 15) has similar absolute ozone concentrations to the 0°E cross-sections, but the anomalies highlight important differences. In NAO+NAO-high, both cross-sections have similar lower tropospheric ozone anomalies except at 50°N (Figures 14c and 15c) with positive anomalies (approximately 1 ppbv) over the UK region and near 0 ppbv over the western North Atlantic. Under NAO-NAO-low conditions, there are positive anomalies (Figure 15d, 20 1-3 ppbv) between 1000-600 hPa and ~~45-70~~50-70°N, but the eastern cross-section (Figure 14d) highlights negative anomalies in this region (-3 to -1 pptv). While there is downwelling of stratospheric ozone in the eastern cross-section into the mid/upper troposphere during NAO-NAO-low, the western cross-section has upwelling of ozone reduced air into the UTLS with negative anomalies of less than -5 ppbv. Overall, in 25 the lower troposphere, the TOMCAT cross-section anomalies support the signals in the TES data. Over the UK (Zone 1, Figure 5, and eastern cross-section, Figure 14), lower tropospheric ozone is larger (lower) than the winter-time average under NAO+ (NAO-NAO-high (NAO-low)), while the opposite occurs in western North Atlantic (Zone 2 and western cross-section, Figure 15).

## 4 Discussion

Analysis of satellite-observed and model-simulated atmospheric composition sampled under the different winter-time NAO phases clearly highlights the importance of transport, both horizontal and vertical, for variability in concentrations of the air pollutant species investigated. At the surface and in the lower troposphere, enhanced westerly flow in **NAO+NAO-high** influences primary pollutant concentrations (e.g. NO<sub>2</sub>) over Europe as they are transported away from source regions and replaced by clear Atlantic air masses. As NO<sub>2</sub> has a short lifetime of several hours, there is little impact of the NAO circulation in the upper troposphere where NO<sub>2</sub> concentrations are much lower. Under **NAO-NAO-low**, the reduced westerly flow significantly aids the accumulation of NO<sub>2</sub> at levels between the surface and approximately 600 hPa. This is important for air pollution levels over source regions which are predominately highly polluted and populated. Ozone has the opposite signal to NO<sub>2</sub> in the lower troposphere where **NAO+NAO-high** replaces primary polluted air (e.g. high NO<sub>x</sub> content) over Europe with ozone-enriched Atlantic air masses. The high ozone content of these air masses is linked to ozone formed downwind of primary pollution from North America and decreased levels of ozone depleting gases (e.g. NO, when photochemical and OH activity are slower) over Europe. Over North America and the western North Atlantic, **NAO+ and NAO-NAO-high and NAO-low** show significant decreases and increases in tropospheric ozone, respectively, as the **NAO+NAO-high** enhanced westerlies transport ozone-enriched air masses towards Europe, while **NAO-NAO-low** weakens this transport pathway resulting in elevated ozone concentration in the region from North American pollution outflow.

In the UTLS, the spatial distribution of PAN is heavily influenced by both horizontal and vertical transport. In **NAO+NAO-high**, as shown by MIPAS (see SM) and Figure 11, the tropopause height is elevated enhancing the vertical transport of PAN into the UTLS over the Arctic and sub-tropical North Atlantic. UTLS horizontal winds also contribute to these elevated PAN concentrations as strong winds (e.g. 30 m/s) help accumulate PAN

in the Arctic. In ~~NAO-NAO-low~~, poleward flow from the sub-tropical North Atlantic has weakened leading to a decrease in PAN over the North Atlantic and there is no longer the accumulation of Arctic PAN. However, the UTLS anticyclone (as seen in Figure 1e) shows a clear accumulation of PAN in the UTLS over southern Greenland/Iceland linked to vertical transport of PAN from the pollutant lower troposphere over Europe (reduced westerlies in ~~NAO-NAO-low~~ allow the accumulation of PAN and  $\text{NO}_x$ ). Ozone in the troposphere and UTLS is anti-correlated with PAN, which we show to be transport dominated, highlighting regions of air mass intrusions from the troposphere into the stratosphere and vice versa. For instance, in the UTLS Icelandic/Southern Greenland anticyclone ozone is significantly reduced while PAN is enhanced. In winter, as photochemical activity and reaction with OH is reduced, polluted air masses with high  $\text{NO}_x$  content will yield low ozone and high PAN concentrations, respectively. However, stratospheric intrusions into the upper troposphere (e.g. Figure 14d between 40-60°N) have a high ozone content but low PAN concentrations as there is limited production of PAN in this part of the atmosphere.

## 5 Conclusions

~~Overall, this study has successfully shown that satellite data, despite the large uncertainty in individual retrievals, can be an important observational data source to investigate the response of atmospheric composition, primarily in the troposphere, to changes in atmospheric circulation such as~~ This study has used state-of-the-art satellite data records of atmospheric trace gases to identify recent influences of the North Atlantic Oscillation (NAO). ~~We have built upon several previous studies (e.g. Eckhardt et al. (2003); T ) by using observations of tropospheric ozone and upper troposphere – lower stratosphere (UTLS) peroxyacetyl nitrate (PAN). We also extend the analysis of Eckhardt et al. (2003) by using tropospheric column nitrogen dioxide on tropospheric composition over the North Atlantic and Europe. We have used tropospheric column  $\text{NO}_2$  ( $\text{TCNO}_2$ ) measurements from the Ozone Monitoring Instrument (OMI), which ~~has provides~~ higher resolution and~~

sampling and longer record than the Global Ozone Monitoring Experiment (GOME).

Our results, supported by simulations from the chemistry transport model (CTM) TOMCAT, show that the different circulation patterns between NAO phases have a significant impact primarily on European tropospheric composition. Under the positive phase of the than past instruments, to detect clear and significant responses (i.e. reduction in UK TCNO<sub>2</sub> during NAO-high) from NAO circulation patterns, building upon the initial signal reported by Eckhardt et al. (2003). Vertical profiles of ozone from the Tropospheric Emissions Spectrometer (TES) allow a detailed assessment of satellite-observed lower tropospheric ozone sampled under the NAO phases. Robust, statistically significant signals are found on both sides of the North Atlantic as a result of changes in the westerly circulation during the two NAO phases. Finally, peroxyacetyl nitrate (PAN) observations in the upper troposphere-lower stratosphere (UTLS) from the Michelson Interferometer for Passive Atmospheric Sounding (MIPAS) are exploited, given the long lifetime of PAN (several months, Singh et al. (1996)), for the first time to investigate vertical transport of polluted tropospheric air masses into the UTLS under different NAO conditions.

Our results, supported by simulations from the TOMCAT chemistry transport model (CTM), confirm that primary pollutant (i.e. NO<sub>2</sub>) concentrations are reduced (enhanced) under NAO-high (NAO+), enhanced westerly flow in the lower troposphere replaces polluted European air masses (eNAO-low) conditions over Europe, heavily dependent on the strength of the westerly flow across the Atlantic. g. high content of nitrogen oxides (NO<sub>x</sub>) with cleaner Atlantic air masses. However, tropospheric ozone concentrations are significantly enhanced in this phase as ozone formed downwind of North American pollution outflow are transported into Europe, as well as the dispersion of ozone sink gases (e.g. secondary pollutants, such as ozone, have anti-correlated patterns as maritime air masses (ozone-enriched air formed downwind from North American primary pollutant emissions) disperse polluted European air masses under NAO-high conditions, significantly increasing the background ozone levels. Under NAO-low conditions, the slackening of the North Atlantic westerly flow, allows for the accumulation of primary



5 pollutants over Europe, where ozone concentrations are further decreased by ozone titration (loss through reaction with nitric oxide, NO, when ozone formation is slower from decreased photochemical and OH activity). In the NAO negative phase, the opposite occurs with-. Different responses to that over Europe are observed and simulated by TES and TOMCAT over the western North Atlantic where enhanced westerly flow (NAO-high conditions) yields lower ozone concentrations and accumulation of primary pollutants from reduced westerly flow, which are important for air quality levels over eastern North America through pollutant (both ozone and ozone precursors) long range transport towards Europe. However, the weakening of the westerly flow (NAO-low conditions) allows ozone to accumulate/form over the region. We also show find that NAO circulation is important for UTLS composition as polluted air masses (i.e.e.g. with high PAN content) originating from Europe during NAO-low (accumulation of lower tropospheric pollution) can propagate to this altitude. For instance, the vertical transport and accumulation of PAN in the NAO-anticyclone resulting in elevated PAN concentrations over Iceland/Southern Greenland. Therefore, the NAO, depending on its phase strength, can be an important driver of winter-time atmospheric composition and air quality across Europe. Model simulations show UTLS ozone spatial patterns over the North Atlantic are strongly anti-correlated to that of PAN, where the two trace gases act as flags for polluted tropospheric and clean stratospheric air in the UTLS.

20 Overall, the use of recent satellite data sets, not used in context of the NAO before, and a model simulation have quantified the recent influences of the NAO on tropospheric composition and co-variability between pollutants.

*Acknowledgements.* This work was supported by the NERC National Centre for Earth Observation (NCEO). TOMCAT modelling development was supported by the National Centre for Atmospheric Science (NCAS). Simulations were performed on the national Archer and Leeds ARC HPC systems. We acknowledge the use of the Tropospheric Emission Monitoring Internet Service (TEMIS) OMI tropospheric column NO<sub>2</sub> data (DOMINO product v2.0), which is available at [www.temis.nl/airpollution/no2](http://www.temis.nl/airpollution/no2). We also acknowledge the use of data from AURN supported by the Department of Environment, Food and Rural Affairs (DEFRA), which is available at [www.uk-air.defra.gov.uk/networks/network-info?view=aurun](http://www.uk-air.defra.gov.uk/networks/network-info?view=aurun), and Lerwick ozonesonde data

provide by the World Ozone and Ultraviolet Radiation Data Centre (<http://woudc.org/>). We also thank the Climatic Research Unit, University of East Anglia for the use of their North Atlantic Oscillation Index data, which can be found at [www.cru.uea.ac.uk/cru/data/nao](http://www.cru.uea.ac.uk/cru/data/nao). Finally, we acknowledge the use of the TES ozone data provided by NASA's JPL (www.reverb.echo.nasa.gov/reverb) and MIPAS data from KIT (<https://www.imk-asf.kit.edu/english/308.php>).

## References

- Bacer, S., Christoudias, T., and Pozzer, A.: Projection of North Atlantic Oscillation and its effect on tracer transport, *Atmospheric Chemistry and Physics*, 16, 15581–15592, doi:10.5194/acp-16-15581-2016, <http://www.atmos-chem-phys.net/16/15581/2016/>, 2016.
- Boersma, K., Eskes, H., Veeffkind, J. P., Brinksma, E., Van Der A, R., Sneep, M., Van Den Oord, G., Levelt, P., Stammes, P., Gleason, J., et al.: Near-real time retrieval of tropospheric NO<sub>2</sub> from OMI, *Atmospheric Chemistry and Physics*, 7, 2103–2118, 2007.
- Boersma, K., Braak, R., and van der A, R.: Dutch OMI NO<sub>2</sub> (DOMINO) data product v2.0, Tropospheric Emissions Monitoring Internet Service on-line documentation, p. [http://www.temis.nl/docs/OMI\\_NO<sub>2</sub>\\_HE5\\_2.0\\_2011.pdf](http://www.temis.nl/docs/OMI_NO2_HE5_2.0_2011.pdf), 2011b.
- Boersma, K. F., Eskes, H. J., and Brinksma, E. J.: Error analysis for tropospheric NO<sub>2</sub> retrieval from space, *Journal of Geophysical Research: Atmospheres*, 109, n/a–n/a, doi:10.1029/2003JD003962, <http://dx.doi.org/10.1029/2003JD003962>, d04311, 2004.
- Braak, R.: Row Anomaly Flagging Rules Lookup Table, KNMI Technical Document TN-OMIE-KNMI-950, 2010.
- Chipperfield, M. P.: New version of the TOMCAT/SLIMCAT off-line chemical transport model: Intercomparison of stratospheric tracer experiments, *Q. J. R. Meteorol. Soc.*, 132, 1179–1203, doi:10.1256/qj.05.51, 2006.
- Chipperfield, M. P., Cariolle, D., Simon, P., Ramaroson, R., and Lary, D. J.: A three-dimensional modeling study of trace species in the Arctic lower stratosphere during winter 1989–1990, *J. Geophys. Res.: Atmos.*, 98, 7199–7218, doi:10.1029/92JD02977, 1993.
- Christoudias, T., Pozzer, A., and Lelieveld, J.: Influence of the North Atlantic Oscillation on air pollution transport, *Atmospheric Chemistry and Physics*, 12, 869–877, doi:10.5194/acp-12-869-2012, <https://www.atmos-chem-phys.net/12/869/2012/>, 2012.

- Cohen, R. C., Wennberg, P. O., Stimpfle, R. M., Koplow, J., Anderson, J. G., Fahey, D. W., Woodbridge, E. L., Keim, E. R., Gao, R., Proffitt, M. H., Loewenstein, M., and Chan, K. R.: Are models of catalytic removal of O<sub>3</sub> by HO<sub>x</sub> accurate? Constraints from in situ measurements of the OH to HO<sub>2</sub> ratio, *Geophysical Research Letters*, 21, 2539–2542, doi: 10.1029/94GL01713, <http://dx.doi.org/10.1029/94GL01713>, 1994.
- Creilson, J. K., Fishman, J., and Wozniak, A. E.: Intercontinental transport of tropospheric ozone: a study of its seasonal variability across the North Atlantic utilizing tropospheric ozone residuals and its relationship to the North Atlantic Oscillation, *Atmospheric Chemistry and Physics*, 3, 2053–2066, doi:10.5194/acp-3-2053-2003, <https://www.atmos-chem-phys.net/3/2053/2003/>, 2003.
- Dee, D. P., Uppala, S. M., Simmons, A. J., Berrisford, P., Poli, P., Kobayashi, S., Andrae, U., Balmaseda, M. A., Balsamo, G., Bauer, P., Bechtold, P., Beljaars, A. C. M., van de Berg, L., Bidlot, J., Bormann, N., Delsol, C., Dragani, R., Fuentes, M., Geer, A. J., Haimberger, L., Healy, S. B., Hersbach, H., Hólm, E. V., Isaksen, I., Kållberg, P., Köhler, M., Matricardi, M., McNally, A. P., Monge-Sanz, B. M., Morcrette, J.-J., Park, B.-K., Peubey, C., de Rosnay, P., Tavolato, C., Thépaut, J.-N., and Vitart, F.: The ERA-Interim reanalysis: configuration and performance of the data assimilation system, *Quarterly Journal of the Royal Meteorological Society*, 137, 553–597, doi:10.1002/qj.828, <http://dx.doi.org/10.1002/qj.828>, 2011.
- DEFRA: Automated Urban and Rural Network (AURN), [uk-air.defra.gov.uk/networks/network-info?view=aurn](http://uk-air.defra.gov.uk/networks/network-info?view=aurn), 2015.
- Eckhardt, S., Stohl, A., Beirle, S., Spichtinger, N., James, P., Forster, C., Junker, C., Wagner, T., Platt, U., and Jennings, S. G.: The North Atlantic Oscillation controls air pollution transport to the Arctic, *Atmospheric Chemistry and Physics*, 3, 1769–1778, doi:10.5194/acp-3-1769-2003, <http://www.atmos-chem-phys.net/3/1769/2003/>, 2003.
- Edwards, D. P., Emmons, L. K., Hauglustaine, D. A., Chu, D. A., Gille, J. C., Kaufman, Y. J., Pétron, G., Yurganov, L. N., Giglio, L., Deeter, M. N., Yudin, V., Ziskin, D. C., Warner, J., Lamarque, J.-F., Francis, G. L., Ho, S. P., Mao, D., Chen, J., Grechko, E. I., and Drummond, J. R.: Observations of carbon monoxide and aerosols from the Terra satellite: Northern Hemisphere variability, *Journal of Geophysical Research: Atmospheres*, 109, n/a–n/a, doi: 10.1029/2004JD004727, <http://dx.doi.org/10.1029/2004JD004727>, d24202, 2004.
- Emmons, L. K., Arnold, S. R., Monks, S. A., Huijnen, V., Tilmes, S., Law, K. S., Thomas, J. L., Raut, J.-C., Bouarar, I., Turquety, S., Long, Y., Duncan, B., Steenrod, S., Strode, S., Flemming, J., Mao, J., Langner, J., Thompson, A. M., Tarasick, D., Apel, E. C., Blake,

- D. R., Cohen, R. C., Dibb, J., Diskin, G. S., Fried, A., Hall, S. R., Huey, L. G., Weinheimer, A. J., Wisthaler, A., Mikoviny, T., Nowak, J., Peischl, J., Roberts, J. M., Ryerson, T., Warneke, C., and Helmig, D.: The POLARCAT Model Intercomparison Project (POLMIP): overview and evaluation with observations, *Atmos. Chem. Phys.*, 15, 6721–6744, doi:10.5194/acp-15-6721-2015, 2015.
- 5 Eskes, H. and Boersma, K.: Averaging kernels for DOAS total-column satellite retrievals, *Atmospheric Chemistry and Physics*, 3, 1285–1291, 2003.
- Evans, M. J. and Jacob, D. J.: Impact of new laboratory studies of N<sub>2</sub>O<sub>5</sub> hydrolysis on global model budgets of tropospheric nitrogen oxides, ozone, and OH, *Geophys. Res. Lett.*, 32, n/a–n/a, doi:10.1029/2005GL022469, 109813, 2005.
- 10 Feng, W., Chipperfield, M. P., Dhomse, S., Monge-Sanz, B. M., Yang, X., Zhang, K., and Ramonet, M.: Evaluation of cloud convection and tracer transport in a three-dimensional chemical transport model, *Atmospheric Chemistry and Physics*, 11, 5783–5803, doi:10.5194/acp-11-5783-2011, <https://www.atmos-chem-phys.net/11/5783/2011/>, 2011.
- 15 Fischer, H., Birk, M., Blom, C., Carli, B., Carlotti, M., von Clarmann, T., Delbouille, L., Dudhia, A., Ehhalt, D., Endemann, M., Flaud, J. M., Gessner, R., Kleinert, A., Koopman, R., Langen, J., López-Puertas, M., Mosner, P., Nett, H., Oelhaf, H., Perron, G., Remedios, J., Ridolfi, M., Stiller, G., and Zander, R.: MIPAS: an instrument for atmospheric and climate research, *Atmos. Chem. Phys.*, 8, 2151–2188, doi:10.5194/acp-8-2151-2008, 2008.
- 20 Glatthor, N., von Clarmann, T., Fischer, H., Funke, B., Grabowski, U., Höpfner, M., Kellmann, S., Kiefer, M., Linden, A., Milz, M., Steck, T., and Stiller, G. P.: Global peroxyacetyl nitrate (PAN) retrieval in the upper troposphere from limb emission spectra of the Michelson Interferometer for Passive Atmospheric Sounding (MIPAS), *Atmos. Chem. Phys.*, 7, 2775–2787, doi:10.5194/acp-7-2775-2007, 2007.
- 25 Granier, C., Bessagnet, B., Bond, T., D’Angiola, A., Denier van der Gon, H., Frost, G. J., Heil, A., Kaiser, J. W., Kinne, S., Klimont, Z., Kloster, S., Lamarque, J.-F., Liousse, C., Masui, T., Meleux, F., Mieville, A., Ohara, T., Raut, J.-C., Riahi, K., Schultz, M. G., Smith, S. J., Thompson, A., Aardenne, J., Werf, G. R., and Vuuren, D. P.: Evolution of anthropogenic and biomass burning emissions of air pollutants at global and regional scales during the 1980–2010 period, *Clim. Chang.*, 109, 163–190, doi:10.1007/s10584-011-0154-1, 2011.
- 30 Holtslag, A. A. M. and Boville, B. A.: Local Versus Nonlocal Boundary-Layer Diffusion in a Global Climate Model, *J. Clim.*, 6, 1825–1842, 1993.
- Hurrell, J. W.: Decadal Trends in the North Atlantic Oscillation: Regional Temperatures

- and Precipitation, *Science*, 269, 676–679, doi:10.1126/science.269.5224.676, <http://science.sciencemag.org/content/269/5224/676>, 1995.
- Hurrell, J. W. and Deser, C.: North Atlantic climate variability: The role of the North Atlantic Oscillation, *Journal of Marine Systems*, 79, 231 – 244, doi:<http://doi.org/10.1016/j.jmarsys.2009.11.002>, <http://www.sciencedirect.com/science/article/pii/S0924796309003224>, impact of climate variability on marine ecosystems: A comparative approach, 2010.
- Jones, P. D., Jonsson, T., and Wheeler, D.: Extension to the North Atlantic oscillation using early instrumental pressure observations from Gibraltar and south-west Iceland, *International Journal of Climatology*, 17, 1433–1450, doi:10.1002/(SICI)1097-0088(19971115)17:13<1433::AID-JOC203>3.0.CO;2-P, 1997.
- Mann, G. W., Carslaw, K. S., Spracklen, D. V., Ridley, D. A., Manktelow, P. T., Chipperfield, M. P., Pickering, S. J., and Johnson, C. E.: Description and evaluation of GLOMAP-mode: a modal global aerosol microphysics model for the UKCA composition-climate model, *Geo. Mod. Dev.*, 3, 519–551, doi:10.5194/gmd-3-519-2010, 2010.
- McNorton, J., Chipperfield, M. P., Gloor, M., Wilson, C., Feng, W., Hayman, G. D., Rigby, M., Krummel, P. B., O'Doherty, S., Prinn, R. G., Weiss, R. F., Young, D., Dlugokencky, E., and Montzka, S. A.: Role of OH variability in the stalling of the global atmospheric CH<sub>4</sub> growth rate from 1999 to 2006, *Atmospheric Chemistry and Physics*, 16, 7943–7956, doi:10.5194/acp-16-7943-2016, <http://www.atmos-chem-phys.net/16/7943/2016/>, 2016.
- Mogili, P. K., Kleiber, P. D., Young, M. A., and Grassian, V. H.: N<sub>2</sub>O<sub>5</sub> hydrolysis on the components of mineral dust and sea salt aerosol: Comparison study in an environmental aerosol reaction chamber, *Atmos. Env.*, 40, 7401 – 7408, doi:<http://dx.doi.org/10.1016/j.atmosenv.2006.06.048>, 2006.
- Monks, S. A., Arnold, S. R., Hollaway, M. J., Pope, R. J., Wilson, C., Feng, W., Emmerson, K. M., Kerridge, B. J., Latter, B. L., Miles, G. M., Siddans, R., and Chipperfield, M. P.: The TOMCAT global chemical transport model v1.6: description of chemical mechanism and model evaluation, *Geoscientific Model Development*, 10, 3025–3057, doi:10.5194/gmd-10-3025-2017, <https://www.geosci-model-dev.net/10/3025/2017/>, 2017.
- Osborn, T. J.: Recent variations in the winter North Atlantic Oscillation, *Weather*, 61, 353–355, doi:10.1256/wea.190.06, <http://dx.doi.org/10.1256/wea.190.06>, 2006.
- Pausata, F. S. R., Pozzoli, L., Vignati, E., and Dentener, F. J.: North Atlantic Oscillation and tropospheric ozone variability in Europe: model analysis and measurements intercomparison, *Atmospheric Chemistry and Physics*, 12, 6357–6376, doi:10.5194/acp-12-6357-2012,

<http://www.atmos-chem-phys.net/12/6357/2012/>, 2012.

Pirovano, G., Balzarini, A., Bessagnet, B., Emery, C., Kallos, G., Meleux, F., Mitsakou, C., Nopmongkol, U., Riva, G., and Yarwood, G.: Investigating impacts of chemistry and transport model formulation on model performance at European scale, *Atmospheric Environment*, 53, 93 – 109, doi:<https://doi.org/10.1016/j.atmosenv.2011.12.052>, <http://www.sciencedirect.com/science/article/pii/S1352231011013422>, aQMEII: An International Initiative for the Evaluation of Regional-Scale Air Quality Models - Phase 1, 2012.

Pope, R. J., Savage, N. H., Chipperfield, M. P., Arnold, S. R., and Osborn, T. J.: The influence of synoptic weather regimes on UK air quality: analysis of satellite column NO<sub>2</sub>, *Atmospheric Science Letters*, 15, 211–217, doi:10.1002/asl2.492, <http://dx.doi.org/10.1002/asl2.492>, 2014.

Pope, R. J., Chipperfield, M. P., Savage, N. H., Ordóñez, C., Neal, L. S., Lee, L. A., Dhomse, S. S., Richards, N. A. D., and Kestlake, T. D.: Evaluation of a regional air quality model using satellite column NO<sub>2</sub>: treatment of observation errors and model boundary conditions and emissions, *Atmospheric Chemistry and Physics*, 15, 5611–5626, doi:10.5194/acp-15-5611-2015, <http://www.atmos-chem-phys.net/15/5611/2015/>, 2015.

Pope, R. J., Richards, N. A. D., Chipperfield, M. P., Moore, D. P., Monks, S. A., Arnold, S. R., Glatthor, N., Kiefer, M., Breider, T. J., Harrison, J. J., Remedios, J. J., Warneke, C., Roberts, J. M., Diskin, G. S., Huey, L. G., Wisthaler, A., Apel, E. C., Bernath, P. F., and Feng, W.: Intercomparison and evaluation of satellite peroxyacetyl nitrate observations in the upper troposphere–lower stratosphere, *Atmospheric Chemistry and Physics*, 16, 13541–13559, doi:10.5194/acp-16-13541-2016, <http://www.atmos-chem-phys.net/16/13541/2016/>, 2016.

Pope, R. J., Arnold, S. R., Chipperfield, M. P., Latter, B. G., Siddans, R., and Kerridge, B. J.: Widespread changes in UK air quality observed from space, *Atmospheric Science Letters*, Accepted.

Prather, M. J.: Numerical advection by conservation of second-order moments, *J. Geophys. Res.: Atmos.*, 91, 6671–6681, doi:10.1029/JD091iD06p06671, 1986.

Pöschl, U., von Kuhlmann, R., Poisson, N., and Crutzen, P.: Development and Intercomparison of Condensed Isoprene Oxidation Mechanisms for Global Atmospheric Modeling, *J. Atmos. Chem.*, 37, 29–52, doi:10.1023/A:1006391009798, 2000.

Quinn, P. K., SHAW, G., ANDREWS, E., DUTTON, E. G., RUOHO-AIROLA, T., and GONG, S. L.: Arctic haze: current trends and knowledge gaps, *Tellus B*, 59, 99–114, doi:10.1111/j.1600-0889.2006.00238.x, <http://dx.doi.org/10.1111/j.1600-0889.2006.00238.x>, 2007.

Randerson, J. T., van der Werf, G. R., Giglio, L., Collatz, G. J., and Kasibhatla, P. S.:

- Global Fire Emissions Database, Version 3 (GFEDv3.1), Data set. Available on-line [<http://daac.ornl.gov/>] from Oak Ridge National Laboratory Distributed Active Archive Center, Oak Ridge, Tennessee, USA, [https://daac.ornl.gov/cgi-bin/dsviewer.pl?ds\\_id=1191](https://daac.ornl.gov/cgi-bin/dsviewer.pl?ds_id=1191), 2013.
- 5 Richards, N. A. D., Osterman, G. B., Browell, E. V., Hair, J. W., Avery, M., and Li, Q.: Validation of Tropospheric Emission Spectrometer ozone profiles with aircraft observations during the Intercontinental Chemical Transport Experiment–B, *Journal of Geophysical Research: Atmospheres*, 113, n/a–n/a, doi:10.1029/2007JD008815, <http://dx.doi.org/10.1029/2007JD008815>, d16S29, 2008.
- 10 Richards, N. A. D., Arnold, S. R., Chipperfield, M. P., Miles, G., Rap, A., Siddans, R., Monks, S. A., and Hollaway, M. J.: The Mediterranean summertime ozone maximum: global emission sensitivities and radiative impacts, *Atmos. Chem. Phys.*, 13, 2331–2345, doi:10.5194/acp-13-2331-2013, 2013.
- Singh, H. B.: Reactive nitrogen in the troposphere, *Environ. Sci. Technol.*, 21, 320–327, doi:10.1021/es00158a001, 1987.
- 15 Singh, H. B., Herlth, D., Kolyer, R., Chatfield, R., Viezee, W., Salas, L. J., Chen, Y., Bradshaw, J. D., Sandholm, S. T., Talbot, R., Gregory, G. L., Anderson, B., Sachse, G. W., Browell, E., Bachmeier, A. S., Blake, D. R., Heikes, B., Jacob, D., and Fuelberg, H. E.: Impact of biomass burning emissions on the composition of the South Atlantic troposphere: Reactive nitrogen and ozone, *J. Geophys. Res.: Atmos.*, 101, 24 203–24 219, doi:10.1029/96JD01018, 1996.
- 20 Stockwell, D. Z. and Chipperfield, M. P.: A tropospheric chemical-transport model: Development and validation of the model transport schemes, *Q. J. R. Meteorol. Soc.*, 125, 1747–1783, doi:10.1002/qj.49712555714, 1999.
- Stohl, A.: Characteristics of atmospheric transport into the Arctic troposphere, *Journal of Geophysical Research: Atmospheres*, 111, n/a–n/a, doi:10.1029/2005JD006888, <http://dx.doi.org/10.1029/2005JD006888>, d11306, 2006.
- 25 Thomas, M. A. and Devasthale, A.: Sensitivity of free tropospheric carbon monoxide to atmospheric weather states and their persistency: an observational assessment over the Nordic countries, *Atmospheric Chemistry and Physics*, 14, 11 545–11 555, doi:10.5194/acp-14-11545-2014, <http://www.atmos-chem-phys.net/14/11545/2014/>, 2014.
- 30 Tiedtke, M.: A comprehensive mass flux scheme for cumulus parameterization in large-scale models, *Mon. Weather Rev.*, 117, 1779–1800, 1989.
- Trigo, I. F.: Climatology and interannual variability of storm-tracks in the Euro-Atlantic sector: a comparison between ERA-40 and NCEP/NCAR reanalyses, *Climate Dynamics*, 26, 127–

- 143, doi:10.1007/s00382-005-0065-9, <http://dx.doi.org/10.1007/s00382-005-0065-9>, 2006.
- Wang, K.-Y., Pyle, J. A., Sanderson, M. G., and Bridgeman, C.: Implementation of a convective atmospheric boundary layer scheme in a tropospheric chemistry transport model, *J. Geophys. Res.: Atmos.*, 104, 23 729–23 745, doi:10.1029/1999JD900383, 1999.
- 5 Wiegele, A., Glatthor, N., Höpfner, M., Grabowski, U., Kellmann, S., Linden, A., Stiller, G., and von Clarmann, T.: Global distributions of C<sub>2</sub>H<sub>6</sub>, C<sub>2</sub>H<sub>2</sub>, HCN, and PAN retrieved from MIPAS reduced spectral resolution measurements, *Atmos. Meas. Tech.*, 5, 723–734, doi:10.5194/amt-5-723-2012, 2012.
- Worden, H. M., Edwards, D. P., Deeter, M. N., Fu, D., Kulawik, S. S., Worden, J. R., and Arellano, A.: Averaging kernel prediction from atmospheric and surface state parameters based on multiple regression for nadir-viewing satellite measurements of carbon monoxide and ozone, *Atmospheric Measurement Techniques*, 6, 1633–1646, doi:10.5194/amt-6-1633-2013, <http://www.atmos-meas-tech.net/6/1633/2013/>, 2013.
- 10 Zhou, Y., Brunner, D., Hueglin, C., Henne, S., and Staehelin, J.: Changes in {OMI} tropospheric {NO<sub>2</sub>} columns over Europe from 2004 to 2009 and the influence of meteorological variability, *Atmospheric Environment*, 46, 482–495, doi:<http://dx.doi.org/10.1016/j.atmosenv.2011.09.024>, 2012.
- 15



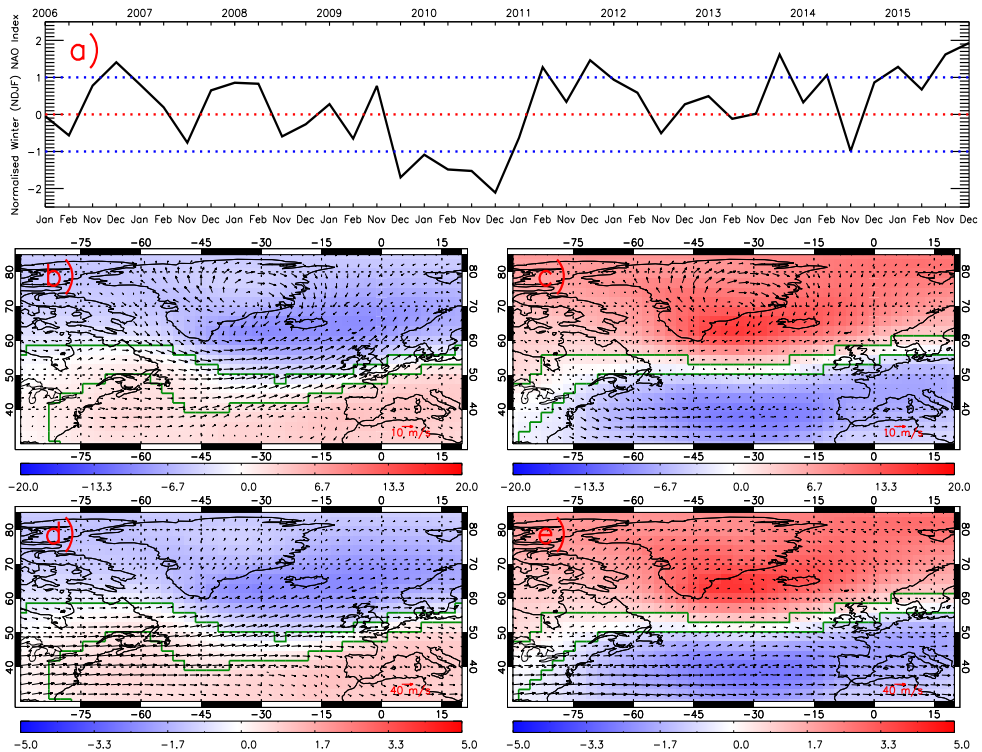

**Fig. 1.** a) The Climate Research Unit (CRU), University of East Anglia, winter-time (November-December-January-February, NDJF) normalised North Atlantic Oscillation (NAO) index for 2006 to 2015. Red and blue lines show the zero and one standard deviation thresholds, where NAO index values outside this range are classed as significant phases. Panels b) and c) show the NAO positive and negative phase surface pressure anomalies (ERA-Interim data) relative to the winter-time average. Panels d) and e) show the same as b) and c), but for 10 km altitude. Wind vectors are over-plotted for the respective NAO phases and altitudes. Green polygoned regions highlight significant differences at the 99% confidence level based on the Wilcoxon Rank Test (WRT).

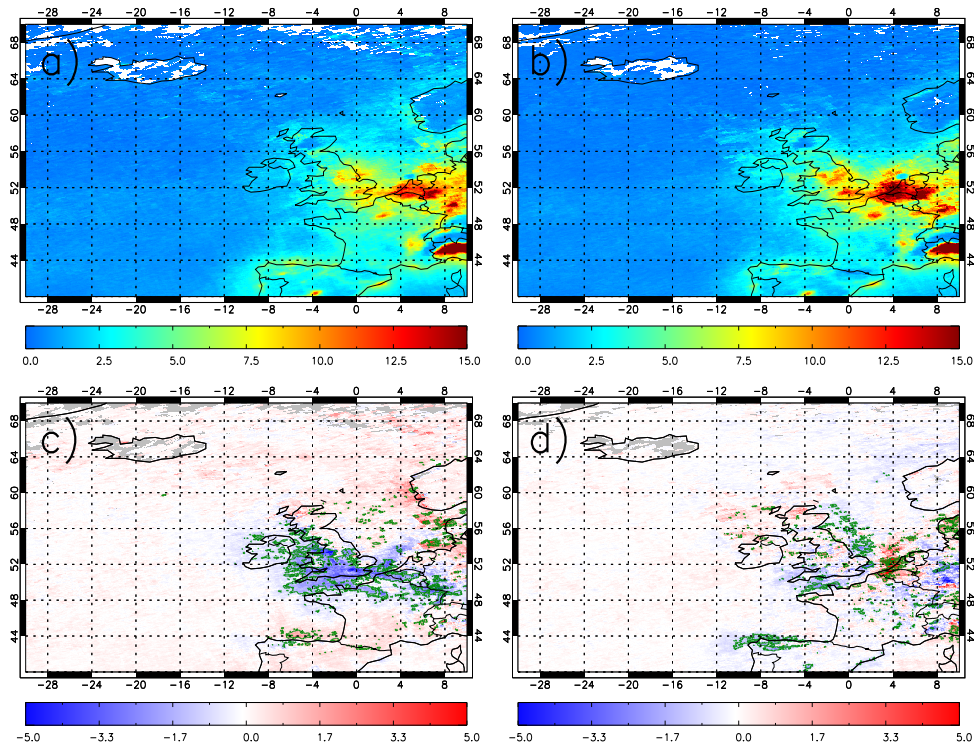

**Fig. 2.** Mean Ozone Monitoring Instrument (OMI) tropospheric column NO<sub>2</sub> (10<sup>15</sup> molecules/m<sup>2</sup>) averaged between 2005 and 2015 under the CRU winter-time (NDJF) NAO index. Panel a) is column NO<sub>2</sub> sampled under the positive NAO phase, b) is column NO<sub>2</sub> sampled under the negative NAO phase, c) shows the column NO<sub>2</sub> positive NAO phase anomaly relative to the winter-time average and d) is the column NO<sub>2</sub> negative NAO phase anomaly relative to the winter-time average. Green polygonned regions highlight significant differences at the 95% confidence level based on the WRT.

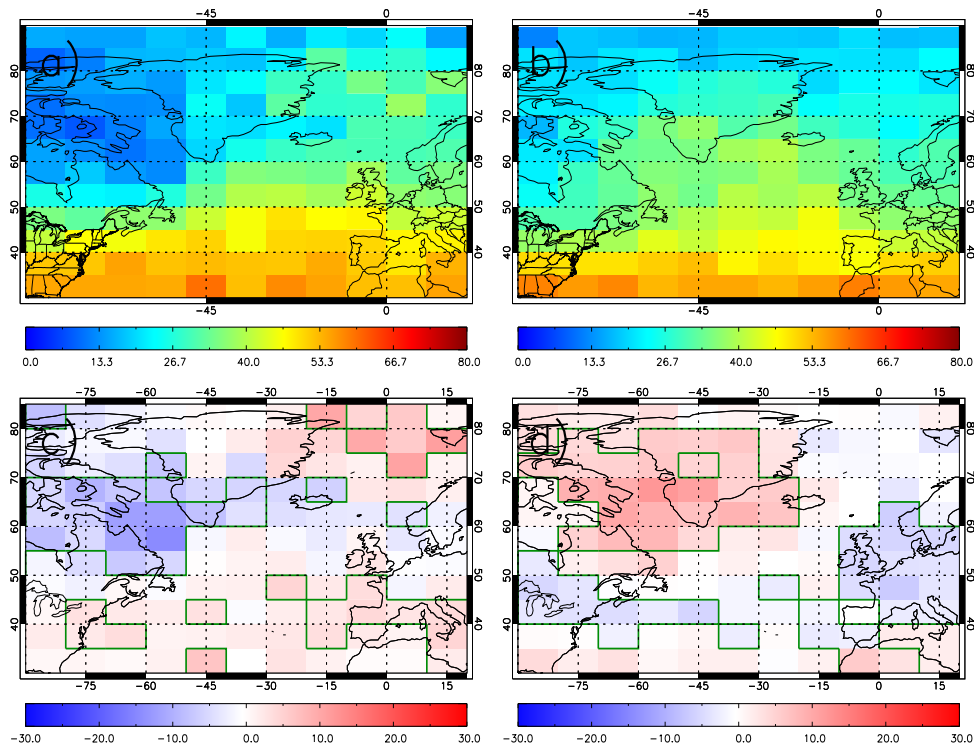

**Fig. 3.** Michelson Interferometer for Passive Atmospheric Sounding (MIPAS) peroxyacetyl nitrate (PAN; pptv) averaged between 200 to 100 hPa for 2002-2012. Panel a) shows PAN sampled under the winter-time (NDJF) NAO positive phase, b) shows PAN sampled under the winter-time NAO negative phase, c) shows the positive NAO phase anomaly relative to the winter-time average and d) shows the negative NAO phase anomaly relative to the winter-time average. Green polygoned regions highlight significant differences at the 95% confidence level based on the WRT.

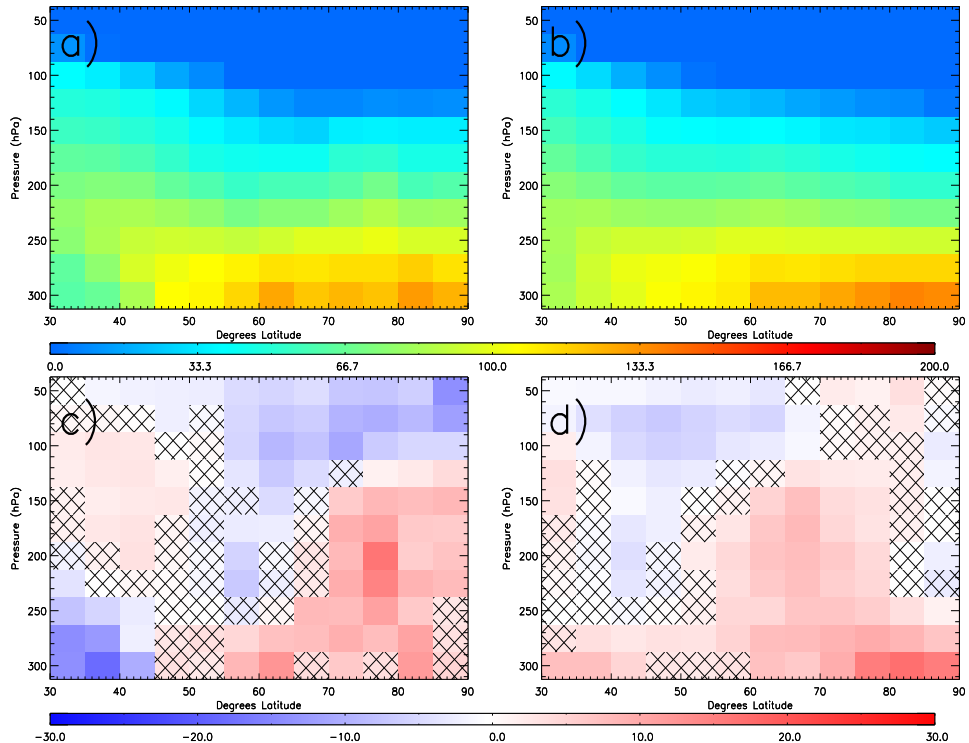

**Fig. 4.** MIPAS PAN (pptv), 2002-2012, zonally averaged (90°W to 20°E) for a) the winter-time (NDJF) NAO positive phase, b) the winter-time NAO negative phase, c) the positive NAO phase anomaly relative to the winter-time average and d) the negative NAO phase anomaly relative to the winter-time average. Black hatched regions highlight insignificant differences at the 95% confidence level based on the WRT.

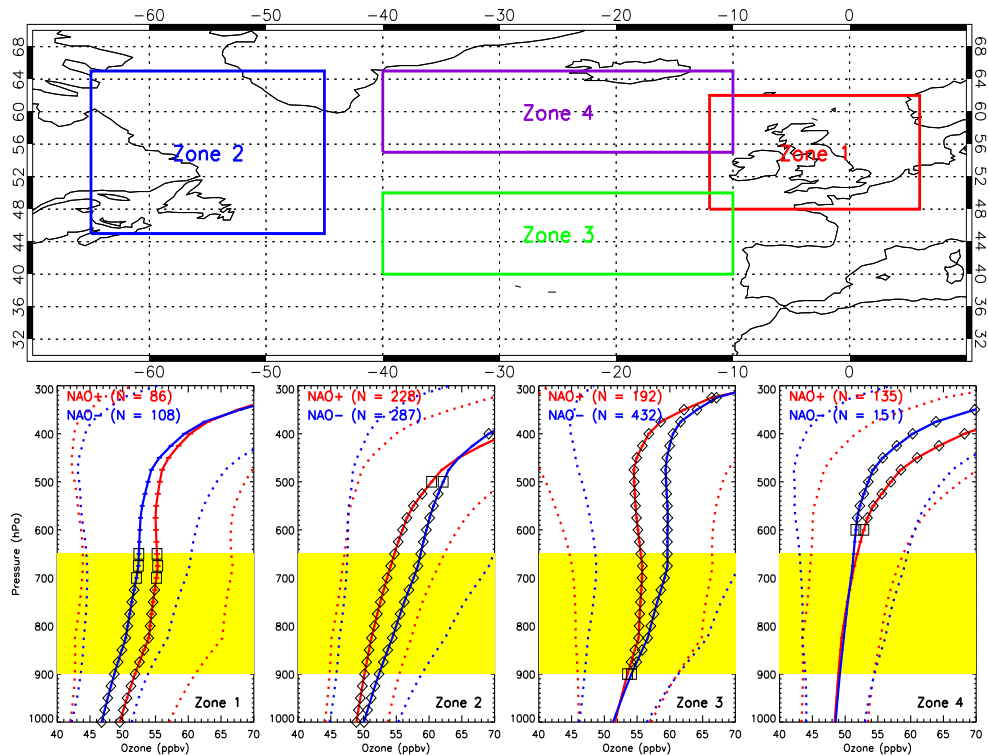

**Fig. 5.** Tropospheric Emission Spectrometer (TES) ozone profiles, averaged over four regions (Zone 1: 12°W-6°E, 48-62°N; Zone 2: 45-65°W, 45-65°N; Zone 3: 10-40°W, 40-50°N; Zone 4: 10-40°W, 55-65°N), between 2005 and 2011, sampled under the winter-time (NDJF) positive (red line) and negative (blue line) phases. Horizontal lines show the satellite uncertainty range, the yellow box highlights the region of peak TES sensitivity to lower tropospheric ozone and the dotted lines show the profile averages  $\pm$  their respective standard deviations. Squares and diamonds show where the ozone profiles sampled under each NAO phase are significantly different from each other at the 90% and 95% confidence levels based on the WRT.

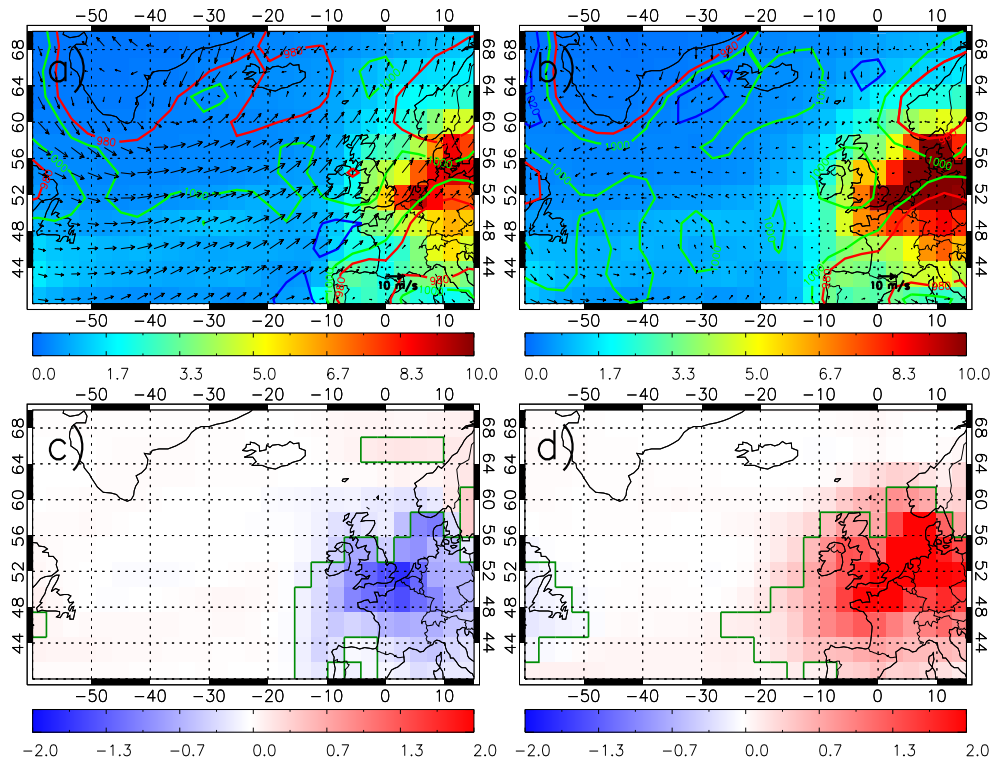

**Fig. 6.** TOMCAT troposphere column  $\text{NO}_2$  ( $10^{15}$  molecules/ $\text{cm}^2$ ) averaged between 2006 and 2015 sampled under the winter-time (NDJF) NAO. Panel a) NAO positive phase, b) NAO negative phase, c) shows the NAO positive phase anomaly relative to the winter-time average and d) shows the negative NAO phase anomaly relative to the winter-time average. Wind vectors show the horizontal 10m winds and the red, green and blue contours represent 980, 1000 and 1020 hPa surface pressure. Green polygonned regions in c) and d) highlight significant differences at the 95% confidence level based on the WRT.

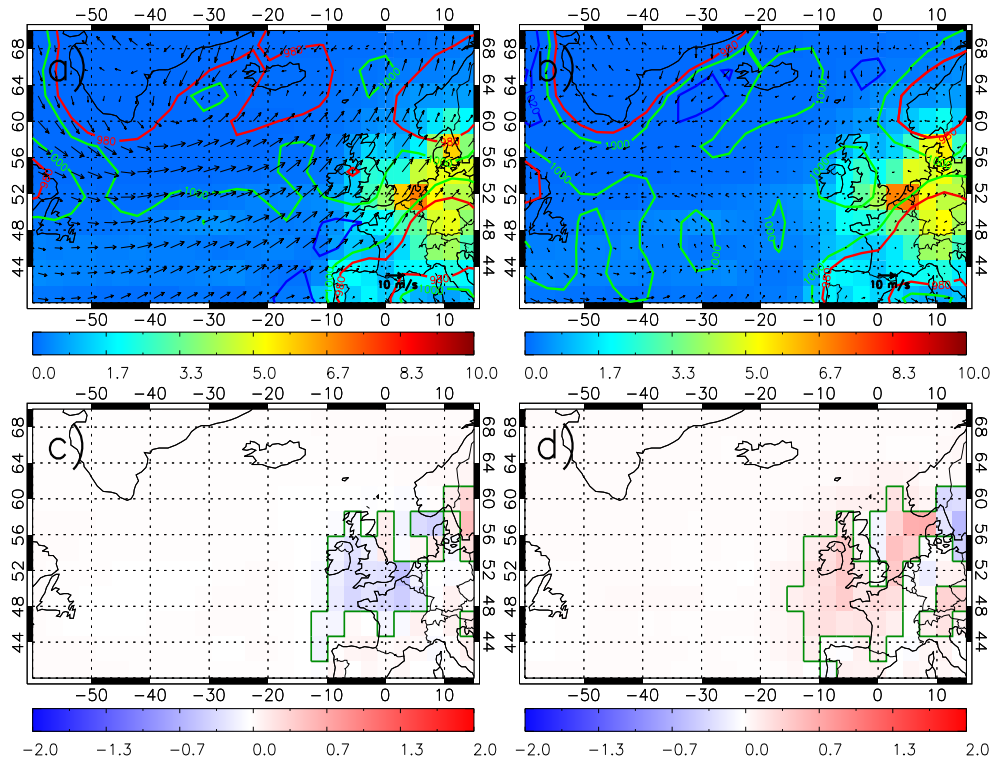

**Fig. 7.** TOMCAT surface  $\text{NO}_2$  (ppbv) averaged between 2006 and 2015 sampled under the winter-time (NDJF) NAO. Panel a) NAO positive phase, b) NAO negative phase, c) shows the NAO positive phase anomaly relative to the winter-time average and d) shows the negative NAO phase anomaly relative to the winter-time average. Wind vectors show the horizontal 10m winds and the red, green and blue contours represent 980, 1000 and 1020 hPa. Green polygonned regions in c) and d) highlight significant differences at the 95% confidence level based on the WRT.

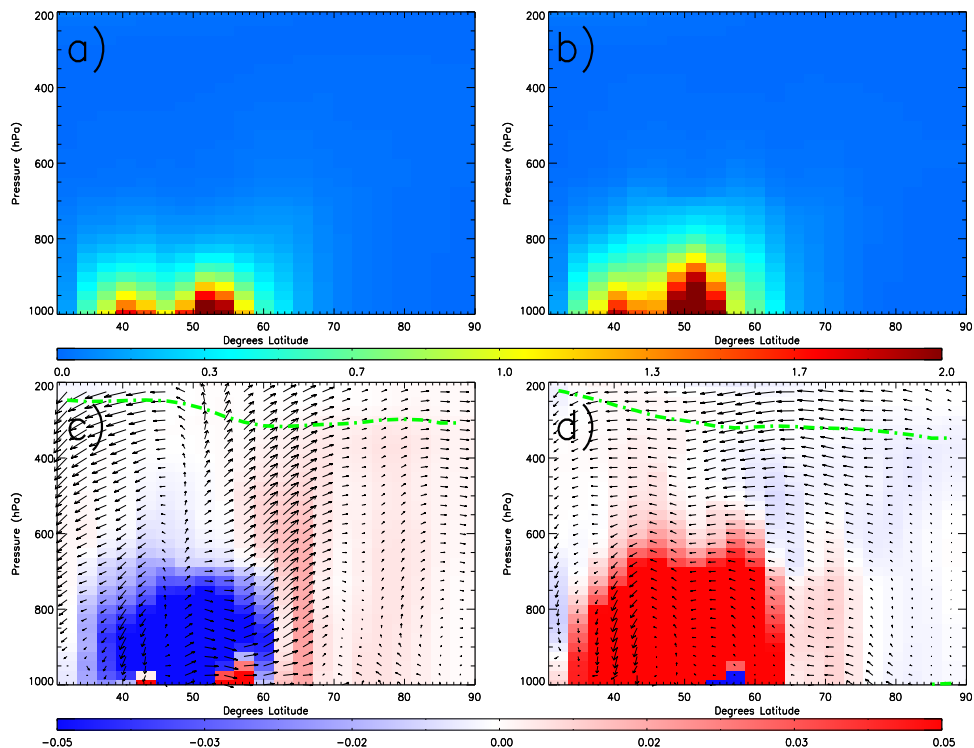

**Fig. 8.** TOMCAT NO<sub>2</sub> (ppbv) cross section at 0°E averaged between 2006 and 2015 sampled under the winter-time (NDJF) NAO. a) NAO positive phase, b) NAO negative phase, c) shows the NAO positive phase anomaly relative to the winter-time average and d) shows the negative NAO phase anomaly relative to the winter-time average. Green dashed lines represents the dynamical tropopause. Wind vectors represent the cross section (0°E) meridional and vertical (scaled by 10<sup>4</sup>) wind vectors.



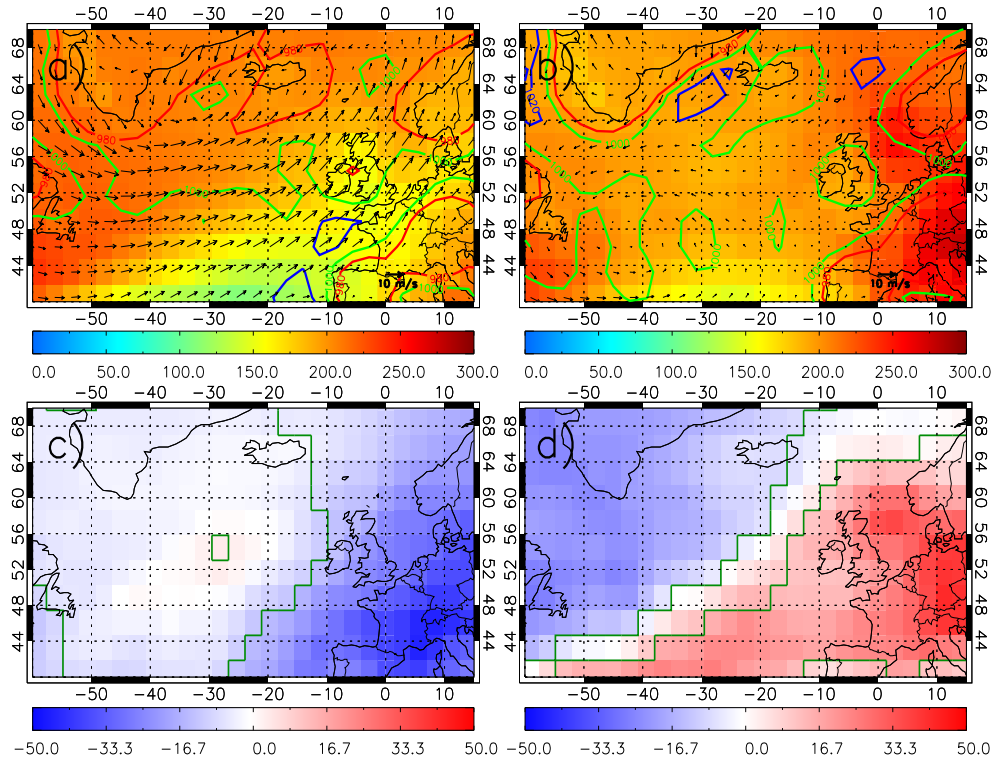

**Fig. 9.** TOMCAT surface PAN (pptv) averaged between 2006 and 2015 sampled under the winter-time (NDJF) NAO. Panel a) NAO positive phase, b) NAO negative phase, c) shows the NAO positive phase anomaly relative to the winter-time average and d) shows the negative NAO phase anomaly relative to the winter-time average. Wind vectors show the horizontal 10m winds and the red, green and blue contours represent 980, 1000 and 1020 hPa surface pressure. Green polygonned regions in c) and d) highlight significant differences at the 95% confidence level based on the WRT.

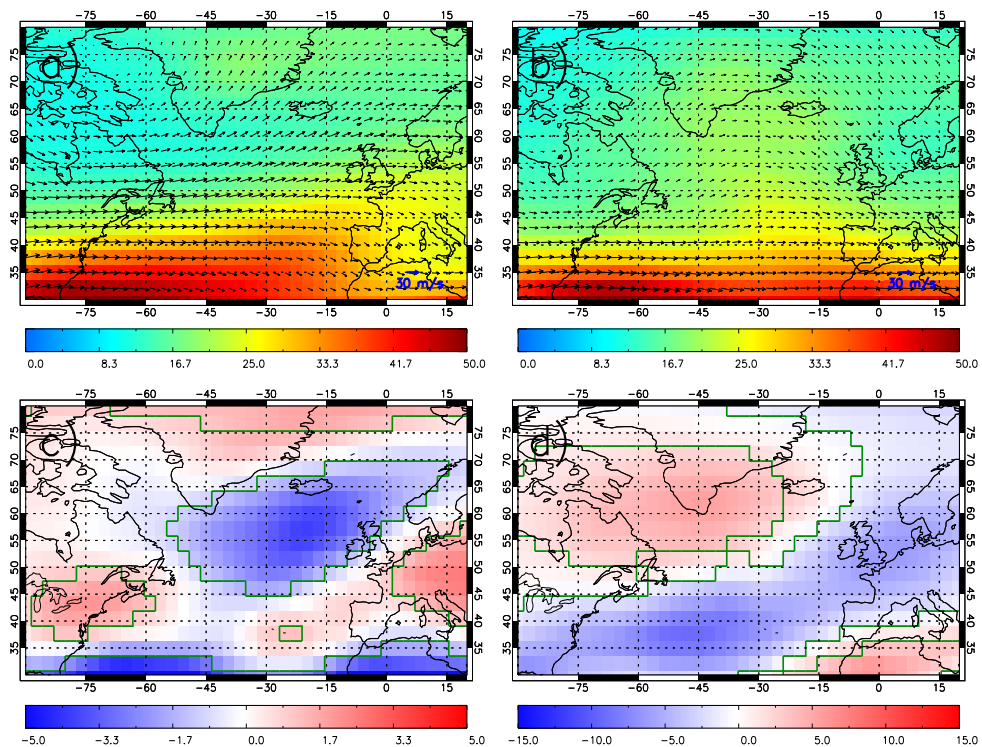

**Fig. 10.** TOMCAT PAN (pptv) averaged between 200 to 100 hPa for 2006-2015 sampled under the winter-time (NDJF) NAO. Panel a) NAO positive phase, b) NAO negative phase, c) shows the NAO positive phase anomaly relative to the winter-time average and d) shows the negative NAO phase anomaly relative to the winter-time average. Wind vectors show the horizontal 200-100 hPa winds. Green polygonned regions in c) and d) highlight significant differences at the 95% confidence level based on the WRT.

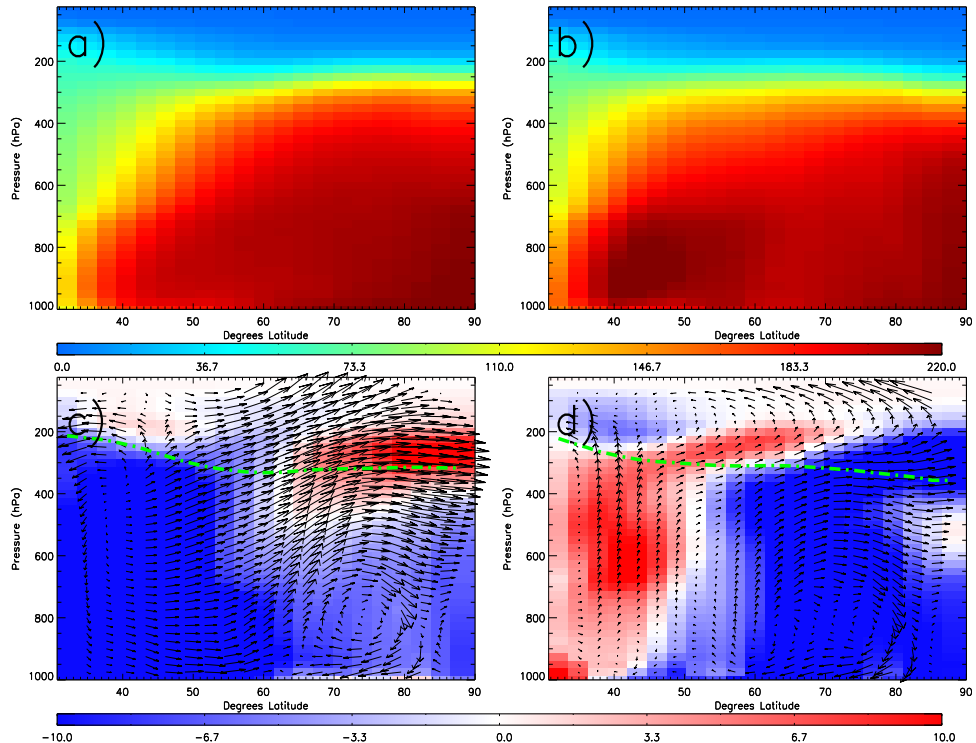

**Fig. 11.** TOMCAT zonally averaged (90°W to 20°E) PAN (pptv) between 2006 and 2015 sampled under the winter-time (NDJF) NAO. Panel a) NAO positive phase, b) NAO negative phase, c) shows the NAO positive phase anomaly relative to the winter-time average and d) shows the negative NAO phase anomaly relative to the winter-time average. Green dashed lines represent the dynamical tropopause. Wind vectors represent the zonally averaged (90°W to 20°E) meridional and vertical (scaled by  $10^4$ ) wind vectors.

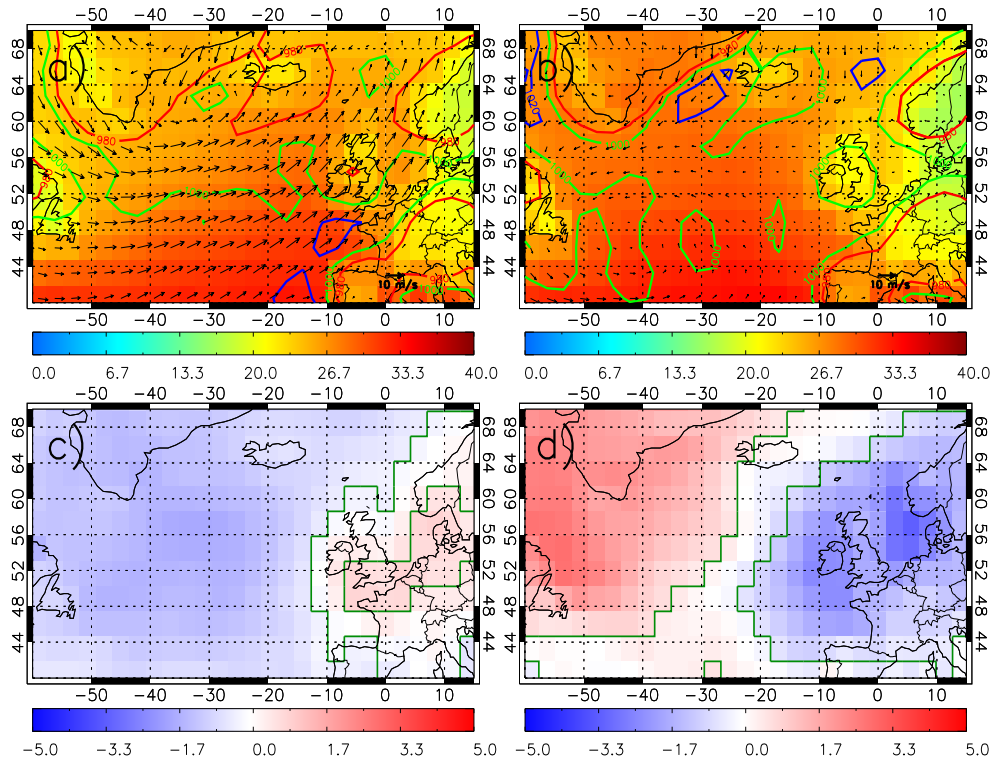

**Fig. 12.** TOMCAT surface ozone (ppbv) averaged between 2006 and 2015 sampled under the winter-time (NDJF) NAO. Panel a) NAO positive phase, b) NAO negative phase, c) shows the NAO positive phase anomaly relative to the winter-time average and d) shows the negative NAO phase anomaly relative to the winter-time average. Wind vectors show the horizontal 10m winds and the red, green and blue contours represent 980, 1000 and 1020 hPa surface pressure. Green polygonned regions in c) and d) highlight significant differences at the 95% confidence level based on the WRT.

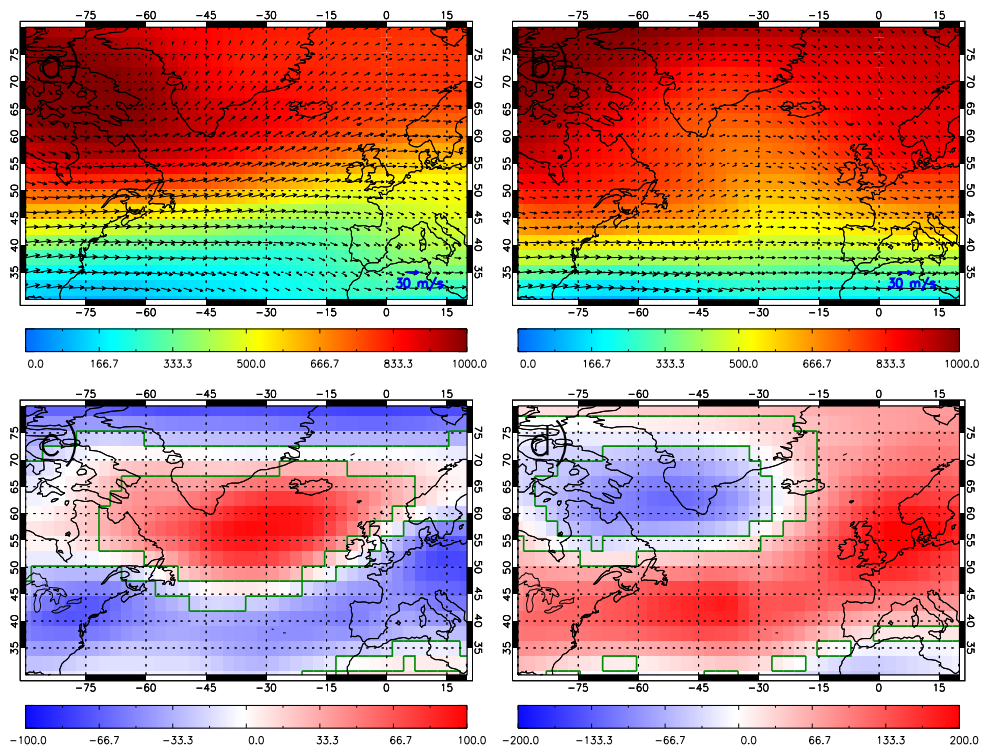

**Fig. 13.** TOMCAT ozone (ppbv) averaged between 200 to 100 hPa for 2006-2015 sampled under the winter-time (NDJF) NAO. Panel a) NAO positive phase, b) NAO negative phase, c) represents the NAO positive phase anomaly relative to the winter-time average and d) represents the negative NAO phase anomaly relative to the winter-time average. Wind vectors show the horizontal 200-100 hPa winds. Green polygonned regions in c) and d) highlight significant differences at the 95% confidence level based on the WRT.

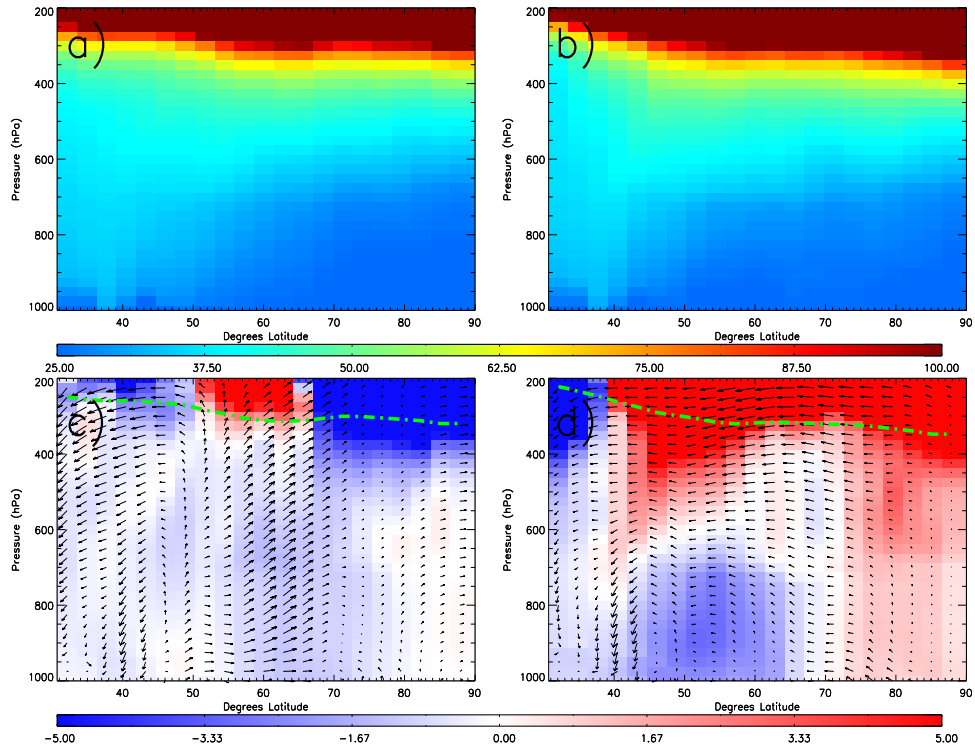

**Fig. 14.** TOMCAT ozone (ppbv) cross section at  $0^{\circ}$ E/W averaged between 2006 and 2015 sampled under the winter-time (NDJF) NAO. Panel a) NAO positive phase, b) NAO negative phase, c) shows the NAO positive phase anomaly relative to the winter-time average and d) shows the negative NAO phase anomaly relative to the winter-time average. Green dashed lines represents the dynamical tropopause. Wind vectors represent the cross section ( $0^{\circ}$ E) meridional and vertical (scaled by  $10^4$ ) wind vectors.

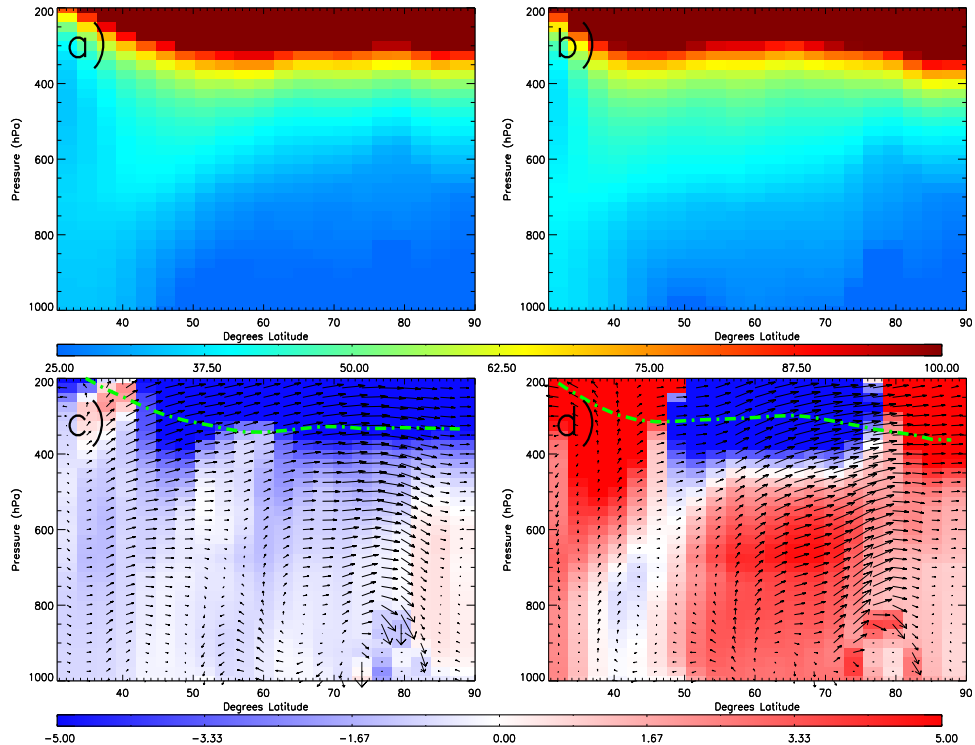

**Fig. 15.** TOMCAT ozone (ppbv) cross section at 56.25°W averaged between 2006 and 2015 sampled under the winter-time (NDJF) NAO. Panel a) NAO positive phase, b) NAO negative phase, c) shows the NAO positive phase anomaly relative to the winter-time average and d) shows the negative NAO phase anomaly relative to the winter-time average. Green dashed lines represents the dynamical tropopause. Wind vectors represent the cross section (56.25°W) meridional and vertical (scaled by  $10^4$ ) wind vectors.
